# Supplementary material for: Modulation of JNK-1/ β-catenin signaling by Lactobacillus casei, inulin and their combination in 1,2-dimethylhydrazine-induced colon cancer in mice
Source: PubMed Central journal article supplement — RSC Adv. 2019 Sep 17;9(50):29368–83. doi: 10.1039/c9ra04388h (PMC9071812; doi:10.1039/c9ra04388h), 2019-09-17
Supplement: RA-009-C9RA04388H-s001.pdf [file RA-009-C9RA04388H-s001.pdf]

## Supporting Information

### Modulation of JNK-1/ $\beta$ -catenin signaling by *Lactobacillus casei*, inulin and their combination in 1,2 dimethylhydrazine- induced colon cancer in mice

**Mohammed S. Ali<sup>1</sup>, Rasha M. Hussein<sup>1,2\*</sup>, Yasser Gaber<sup>2,3</sup>, Olfat Ali Hammam<sup>4</sup>, Mohamed A. Kandeil<sup>5</sup>**

<sup>1</sup> Department of Biochemistry, Faculty of Pharmacy, Beni-Suef University, 62514, Beni-Suef, Egypt.

<sup>2</sup> Department of Pharmaceutics and Pharmaceutical Technology, College of Pharmacy, Mutah University, 61710, Al-Karak, Jordan

<sup>3</sup> Department of Microbiology and Immunology, Faculty of Pharmacy, Beni-Suef University, 62514, Beni-Suef, Egypt.

<sup>4</sup> Pathology Department, Theodor Bilharz Research Institute, 12411 Giza, Egypt.

<sup>5</sup> Department of Biochemistry, Faculty of Veterinary Medicine, Beni-Suef University, Egypt

#### Corresponding author:

\*Rasha M. Hussein

Department of Biochemistry, Faculty of Pharmacy

Beni-Suef University, Salah Salem Street, 62514, Beni-Suef, Egypt

Email: rasha.hussein@pharm.bsu.edu.eg

## **Table of Contents**

|                                                                                                                                              |           |
|----------------------------------------------------------------------------------------------------------------------------------------------|-----------|
| <b>1. <i>Figure S1 , Phylogenetic relation of the animal groups based on the reads counts obtained from the microbiome results .....</i></b> | <b>3</b>  |
| <b>2. <i>Table S1, The distribution of reads along the quality check protocol and DADA2 routine. ....</i></b>                                | <b>4</b>  |
| <b>3. <i>Table S2 Kingdom-level taxon distribution of the reads count obtained.....</i></b>                                                  | <b>4</b>  |
| <b>4. <i>Table S3 Phylum-level taxon distribution of the reads count obtained.....</i></b>                                                   | <b>5</b>  |
| <b>5. <i>Table S4 Class-level taxon distribution of the reads count obtained .....</i></b>                                                   | <b>6</b>  |
| <b>6. <i>Table S5 Order-level taxon distribution of the reads count obtained.....</i></b>                                                    | <b>8</b>  |
| <b>7. <i>Table S6 Family-level taxon distribution of the reads count obtained.....</i></b>                                                   | <b>12</b> |
| <b>8. <i>Table S7 Genus-level taxon distribution of the reads count obtained.....</i></b>                                                    | <b>21</b> |
| <b>9. <i>References .....</i></b>                                                                                                            | <b>48</b> |

1. Figure S1 , Phylogenetic relation of the animal groups based on the reads counts obtained from the microbiome results  
( Figure generated using MicrobiomeAnalyst <https://www.microbiomeanalyst.ca>)

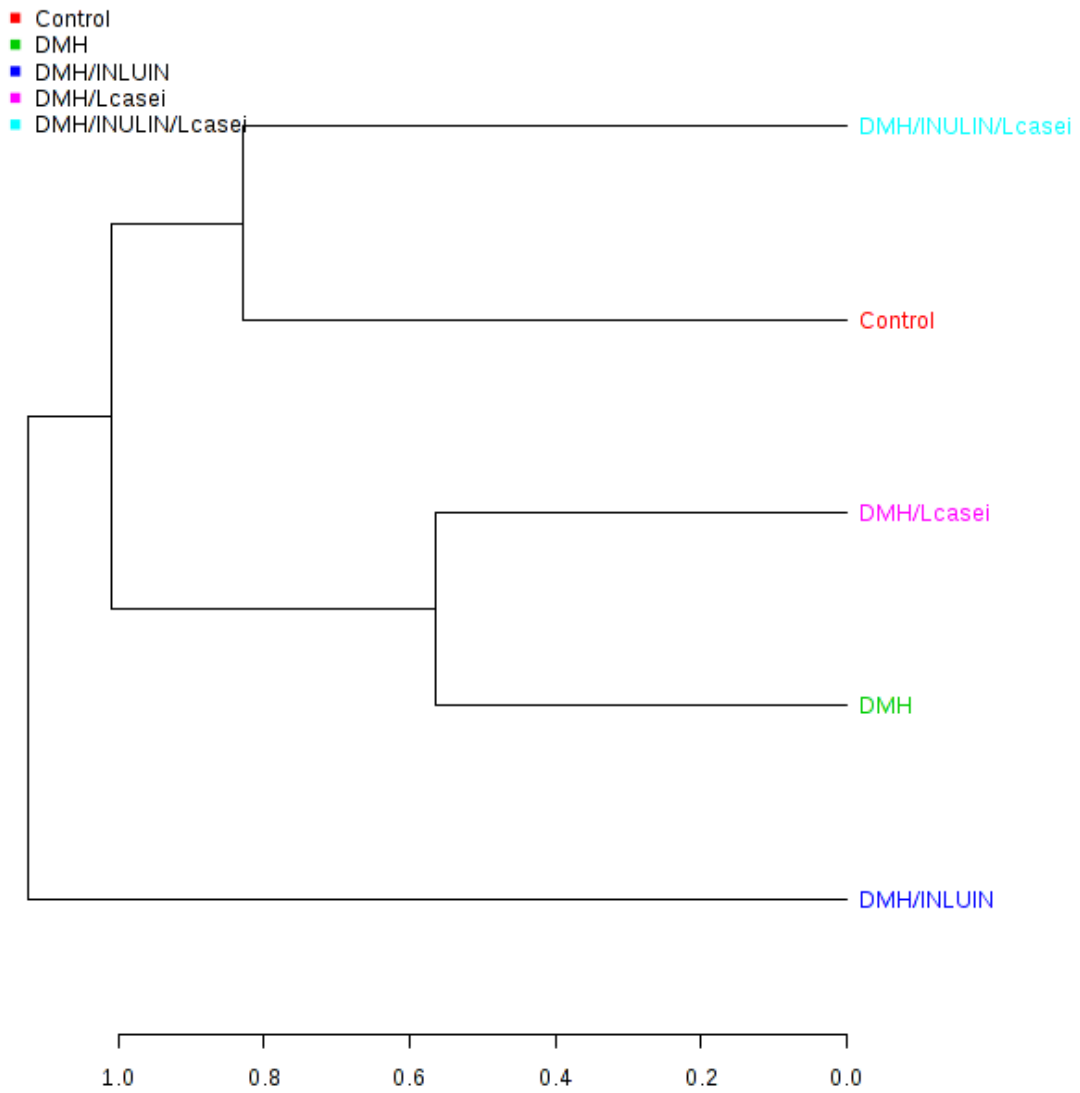

**2. Table S1, The distribution of reads along the quality check protocol and DADA2 routine.**

|                                | <b>input</b> | <b>filtered</b> | <b>denoised</b> | <b>merged</b> | <b>non-chimeric</b> |
|--------------------------------|--------------|-----------------|-----------------|---------------|---------------------|
| <b>Control</b>                 | 73617        | 59262           | 59262           | 58527         | 57980               |
| <b>DMH</b>                     | 150362       | 119594          | 119594          | 117061        | 114847              |
| <b>DMH + Inulin</b>            | 121299       | 96494           | 96494           | 95531         | 95251               |
| <b>DMH + L. casei</b>          | 111737       | 88378           | 88378           | 86741         | 85662               |
| <b>DMH + L. casei + Inulin</b> | 128539       | 100553          | 100553          | 99112         | 97899               |
| <b>Sequencing control</b>      | 834          | 291             | 291             | 227           | 227                 |

**3. Table S2 Kingdom-level taxon distribution of the reads count obtained**

| #OTU ID     | Control | DMH    | DMH + Inulin | DMH + L. casei | DMH + L. casei + Inulin | Sequencing control |
|-------------|---------|--------|--------------|----------------|-------------------------|--------------------|
| k__Bacteria | 57971   | 114842 | 95249        | 85656          | 97886                   | 227                |
| Unassigned  | 9       | 5      | 2            | 6              | 13                      | 0                  |

**4. Table S3 Phylum-level taxon distribution of the reads count obtained**

| #OTU ID                               | Control | DMH   | DMH + Inulin | DMH + L. casei | DMH + L. casei + Inulin | Sequencing control |
|---------------------------------------|---------|-------|--------------|----------------|-------------------------|--------------------|
| k__Bacteria;p__Acidobacteria          | 21      | 0     | 0            | 0              | 13                      | 0                  |
| k__Bacteria;p__Actinobacteria         | 971     | 2289  | 1471         | 943            | 1873                    | 12                 |
| k__Bacteria;p__Bacteroidetes          | 10577   | 54531 | 7161         | 39453          | 25101                   | 17                 |
| k__Bacteria;p__Chlamydiae             | 49      | 8     | 21           | 10             | 54                      | 0                  |
| k__Bacteria;p__Chloroflexi            | 16      | 3     | 5            | 7              | 38                      | 0                  |
| k__Bacteria;p__Coprothermobacteraeota | 0       | 0     | 4            | 0              | 5                       | 0                  |
| k__Bacteria;p__Cyanobacteria          | 2118    | 535   | 1673         | 492            | 1641                    | 4                  |
| k__Bacteria;p__Dadabacteria           | 13      | 0     | 7            | 0              | 14                      | 0                  |
| k__Bacteria;p__Deferribacteres        | 0       | 38    | 0            | 52             | 13                      | 0                  |
| k__Bacteria;p__Deinococcus-Thermus    | 14      | 3     | 6            | 0              | 9                       | 0                  |
| k__Bacteria;p__Epsilonbacteraeota     | 0       | 168   | 16           | 577            | 43                      | 0                  |
| k__Bacteria;p__Firmicutes             | 7929    | 20721 | 59270        | 27539          | 14961                   | 33                 |
| k__Bacteria;p__Fusobacteria           | 12      | 0     | 41           | 9              | 11                      | 7                  |
| k__Bacteria;p__Gemmatimonadetes       | 0       | 0     | 0            | 0              | 6                       | 0                  |
| k__Bacteria;p__Kiritimatiellaeota     | 0       | 0     | 2            | 0              | 0                       | 0                  |
| k__Bacteria;p__Nitrospirae            | 0       | 0     | 6            | 0              | 3                       | 0                  |
| k__Bacteria;p__Patescibacteria        | 1625    | 10373 | 939          | 2379           | 2372                    | 0                  |
| k__Bacteria;p__Planctomycetes         | 92      | 10    | 81           | 51             | 121                     | 0                  |
| k__Bacteria;p__Proteobacteria         | 34442   | 25882 | 24467        | 12017          | 37236                   | 149                |
| k__Bacteria;p__Spirochaetes           | 12      | 74    | 15           | 62             | 33                      | 0                  |
| k__Bacteria;p__Synergistetes          | 8       | 0     | 0            | 0              | 0                       | 0                  |

|                              |    |     |    |      |       |   |
|------------------------------|----|-----|----|------|-------|---|
| k_Bacteria;p_Tenericutes     | 69 | 187 | 24 | 223  | 92    | 0 |
| k_Bacteria;p_Verrucomicrobia | 0  | 15  | 40 | 1840 | 14237 | 5 |
| k_Bacteria;__                | 3  | 5   | 0  | 2    | 10    | 0 |
| Unassigned;__                | 9  | 5   | 2  | 6    | 13    | 0 |

### 5. Table S4 Class-level taxon distribution of the reads count obtained

| #OTU ID                                                   | Control | DMH   | DMH + Inulin | DMH + L. casei | DMH + L. casei + Inulin | Sequencing control |
|-----------------------------------------------------------|---------|-------|--------------|----------------|-------------------------|--------------------|
| k_Bacteria;p_Proteobacteria;c_Gammaproteobacteria         | 1474    | 16268 | 1657         | 699            | 1469                    | 98                 |
| k_Bacteria;p_Proteobacteria;c_Alphaproteobacteria         | 32955   | 9245  | 22747        | 11053          | 35361                   | 39                 |
| k_Bacteria;p_Firmicutes;c_Bacilli                         | 6147    | 11581 | 56006        | 20778          | 7576                    | 22                 |
| k_Bacteria;p_Firmicutes;c_Clostridia                      | 1372    | 7890  | 1608         | 4445           | 4986                    | 11                 |
| k_Bacteria;p_Bacteroidetes;c_Bacteroidia                  | 10577   | 54531 | 7161         | 39453          | 25101                   | 17                 |
| k_Bacteria;p_Firmicutes;c_Negativicutes                   | 315     | 380   | 760          | 552            | 142                     | 0                  |
| k_Bacteria;p_Coprothermobacteraeota;c_Coprothermobacteria | 0       | 0     | 4            | 0              | 5                       | 0                  |
| k_Bacteria;p_Acidobacteria;c_Acidobacteriia               | 21      | 0     | 0            | 0              | 0                       | 0                  |
| k_Bacteria;p_Acidobacteria;c_Blastocatellia (Subgroup 4)  | 0       | 0     | 0            | 0              | 4                       | 0                  |
| k_Bacteria;p_Acidobacteria;c_Subgroup 6                   | 0       | 0     | 0            | 0              | 9                       | 0                  |
| k_Bacteria;p_Actinobacteria;c_Acidimicrobiia              | 14      | 0     | 7            | 2              | 0                       | 0                  |
| k_Bacteria;p_Actinobacteria;c_Actinobacteria              | 702     | 286   | 1219         | 186            | 1038                    | 12                 |
| k_Bacteria;p_Actinobacteria;c_Coriobacteriia              | 250     | 2003  | 245          | 753            | 835                     | 0                  |
| k_Bacteria;p_Actinobacteria;c_Nitiliruptoria              | 0       | 0     | 0            | 2              | 0                       | 0                  |
| k_Bacteria;p_Actinobacteria;c_Thermoleophilia             | 5       | 0     | 0            | 0              | 0                       | 0                  |

|                                                   |      |       |      |      |       |    |
|---------------------------------------------------|------|-------|------|------|-------|----|
| k_Bacteria;p_Chlamydiae;c_Chlamydiae              | 49   | 8     | 21   | 10   | 54    | 0  |
| k_Bacteria;p_Chloroflexi;c_Anaerolineae           | 6    | 0     | 0    | 0    | 14    | 0  |
| k_Bacteria;p_Chloroflexi;c_Chloroflexia           | 3    | 0     | 0    | 7    | 24    | 0  |
| k_Bacteria;p_Chloroflexi;c_Gitt-GS-136            | 7    | 3     | 5    | 0    | 0     | 0  |
| k_Bacteria;p_Cyanobacteria;c_Melainabacteria      | 207  | 98    | 68   | 68   | 327   | 0  |
| k_Bacteria;p_Cyanobacteria;c_Oxyphotobacteria     | 1911 | 437   | 1605 | 424  | 1314  | 4  |
| k_Bacteria;p_Dadabacteria;c_Dadabacteriia         | 13   | 0     | 7    | 0    | 14    | 0  |
| k_Bacteria;p_Deferribacteres;c_Deferribacteres    | 0    | 38    | 0    | 52   | 13    | 0  |
| k_Bacteria;p_Deinococcus-Thermus;c_Deinococci     | 14   | 3     | 6    | 0    | 9     | 0  |
| k_Bacteria;p_Epsilonbacteraeota;c_Campylobacteria | 0    | 168   | 16   | 577  | 43    | 0  |
| k_Bacteria;p_Firmicutes;c_Erysipelotrichia        | 95   | 870   | 896  | 1764 | 2257  | 0  |
| k_Bacteria;p_Fusobacteria;c_Fusobacteriia         | 12   | 0     | 41   | 9    | 11    | 7  |
| k_Bacteria;p_Gemmatimonadetes;c_Gemmatimonadetes  | 0    | 0     | 0    | 0    | 6     | 0  |
| k_Bacteria;p_Kiritimatiellaeota;c_Kiritimatiellae | 0    | 0     | 2    | 0    | 0     | 0  |
| k_Bacteria;p_Nitrospirae;c_Nitrospira             | 0    | 0     | 6    | 0    | 3     | 0  |
| k_Bacteria;p_Patescibacteria;c_Saccharimonadia    | 1625 | 10373 | 939  | 2379 | 2372  | 0  |
| k_Bacteria;p_Planctomycetes;c_Phycisphaerae       | 59   | 0     | 37   | 14   | 46    | 0  |
| k_Bacteria;p_Planctomycetes;c_Planctomycetacia    | 33   | 10    | 44   | 37   | 75    | 0  |
| k_Bacteria;p_Proteobacteria;c_Deltaproteobacteria | 13   | 369   | 63   | 265  | 406   | 12 |
| k_Bacteria;p_Spirochaetes;c_Spirochaetia          | 12   | 74    | 15   | 62   | 33    | 0  |
| k_Bacteria;p_Synergistetes;c_Synergistia          | 8    | 0     | 0    | 0    | 0     | 0  |
| k_Bacteria;p_Tenericutes;c_Mollicutes             | 69   | 187   | 24   | 223  | 92    | 0  |
| k_Bacteria;p_Verrucomicrobia;c_Verrucomicrobiae   | 0    | 15    | 40   | 1840 | 14237 | 5  |
| k_Bacteria;__;__                                  | 3    | 5     | 0    | 2    | 10    | 0  |
| Unassigned;__;__                                  | 9    | 5     | 2    | 6    | 13    | 0  |

6. Table S5 Order-level taxon distribution of the reads count obtained

| #OTU ID                                                                  | Control | DMH   | DMH + Inulin | DMH + L. casei | DMH + L. casei + Inulin | Sequencing control |
|--------------------------------------------------------------------------|---------|-------|--------------|----------------|-------------------------|--------------------|
| k__Bacteria;p__Acidobacteria;c__Acidobacteriia;o__Solibacterales         | 21      | 0     | 0            | 0              | 0                       | 0                  |
| k__Bacteria;p__Acidobacteria;c__Blastocatellia (Subgroup 4);o__11-24     | 0       | 0     | 0            | 0              | 4                       | 0                  |
| k__Bacteria;p__Acidobacteria;c__Subgroup 6;__                            | 0       | 0     | 0            | 0              | 9                       | 0                  |
| k__Bacteria;p__Actinobacteria;c__Acidimicrobiia;o__Microtrichales        | 14      | 0     | 7            | 2              | 0                       | 0                  |
| k__Bacteria;p__Actinobacteria;c__Actinobacteria;o__Actinomycetales       | 20      | 0     | 120          | 0              | 16                      | 0                  |
| k__Bacteria;p__Actinobacteria;c__Actinobacteria;o__Bifidobacteriales     | 14      | 2     | 26           | 11             | 6                       | 0                  |
| k__Bacteria;p__Actinobacteria;c__Actinobacteria;o__Corynebacteriales     | 138     | 176   | 333          | 36             | 451                     | 12                 |
| k__Bacteria;p__Actinobacteria;c__Actinobacteria;o__Frankiales            | 14      | 2     | 0            | 0              | 4                       | 0                  |
| k__Bacteria;p__Actinobacteria;c__Actinobacteria;o__Micrococcales         | 369     | 76    | 526          | 93             | 397                     | 0                  |
| k__Bacteria;p__Actinobacteria;c__Actinobacteria;o__Micromonosporales     | 8       | 0     | 0            | 0              | 0                       | 0                  |
| k__Bacteria;p__Actinobacteria;c__Actinobacteria;o__Propionibacteriales   | 135     | 30    | 214          | 46             | 161                     | 0                  |
| k__Bacteria;p__Actinobacteria;c__Actinobacteria;o__Pseudonocardiales     | 4       | 0     | 0            | 0              | 3                       | 0                  |
| k__Bacteria;p__Actinobacteria;c__Coriobacteriia;o__Coriobacteriales      | 250     | 2003  | 245          | 753            | 835                     | 0                  |
| k__Bacteria;p__Actinobacteria;c__Nitriliruptoria;o__Nitriliruptorales    | 0       | 0     | 0            | 2              | 0                       | 0                  |
| k__Bacteria;p__Actinobacteria;c__Thermoleophilia;o__Solirubrobacteriales | 5       | 0     | 0            | 0              | 0                       | 0                  |
| k__Bacteria;p__Bacteroidetes;c__Bacteroidia;o__Bacteroidales             | 10027   | 54235 | 6928         | 39298          | 24533                   | 11                 |
| k__Bacteria;p__Bacteroidetes;c__Bacteroidia;o__Chitinophagales           | 53      | 40    | 67           | 49             | 118                     | 0                  |
| k__Bacteria;p__Bacteroidetes;c__Bacteroidia;o__Cytophagales              | 308     | 62    | 30           | 59             | 277                     | 0                  |
| k__Bacteria;p__Bacteroidetes;c__Bacteroidia;o__Flavobacteriales          | 97      | 165   | 77           | 24             | 105                     | 3                  |
| k__Bacteria;p__Bacteroidetes;c__Bacteroidia;o__Sphingobacteriales        | 92      | 29    | 59           | 23             | 68                      | 3                  |



|                                                                                       |      |       |       |       |      |    |
|---------------------------------------------------------------------------------------|------|-------|-------|-------|------|----|
| k__Bacteria;p__Chlamydiae;c__Chlamydiae;o__Chlamydiales                               | 49   | 8     | 21    | 10    | 54   | 0  |
| k__Bacteria;p__Chloroflexi;c__Anaerolineae;o__Caldilineales                           | 0    | 0     | 0     | 0     | 11   | 0  |
| k__Bacteria;p__Chloroflexi;c__Anaerolineae;o__RBG-13-54-9                             | 0    | 0     | 0     | 0     | 3    | 0  |
| k__Bacteria;p__Chloroflexi;c__Anaerolineae;__                                         | 6    | 0     | 0     | 0     | 0    | 0  |
| k__Bacteria;p__Chloroflexi;c__Chloroflexia;o__Chloroflexales                          | 3    | 0     | 0     | 0     | 0    | 0  |
| k__Bacteria;p__Chloroflexi;c__Chloroflexia;o__Thermomicrobiales                       | 0    | 0     | 0     | 7     | 24   | 0  |
| k__Bacteria;p__Chloroflexi;c__Gitt-GS-136;o__uncultured bacterium                     | 7    | 0     | 0     | 0     | 0    | 0  |
| k__Bacteria;p__Chloroflexi;c__Gitt-GS-136;__                                          | 0    | 3     | 5     | 0     | 0    | 0  |
| k__Bacteria;p__Coprothermobacteraeota;c__Coprothermobacteria;o__Coprothermobacterales | 0    | 0     | 4     | 0     | 5    | 0  |
| k__Bacteria;p__Cyanobacteria;c__Melainabacteria;o__Gastranaerophilales                | 37   | 56    | 2     | 29    | 90   | 0  |
| k__Bacteria;p__Cyanobacteria;c__Melainabacteria;o__Obscuribacterales                  | 170  | 42    | 66    | 39    | 237  | 0  |
| k__Bacteria;p__Cyanobacteria;c__Oxyphotobacteria;o__Chloroplast                       | 1911 | 437   | 1605  | 424   | 1314 | 4  |
| k__Bacteria;p__Dadabacteria;c__Dadabacteriia;o__Dadabacteriales                       | 13   | 0     | 7     | 0     | 14   | 0  |
| k__Bacteria;p__Deferribacteres;c__Deferribacteres;o__Deferribacterales                | 0    | 38    | 0     | 52    | 13   | 0  |
| k__Bacteria;p__Deinococcus-Thermus;c__Deinococci;o__Deinococcales                     | 0    | 0     | 6     | 0     | 4    | 0  |
| k__Bacteria;p__Deinococcus-Thermus;c__Deinococci;o__Thermales                         | 14   | 3     | 0     | 0     | 5    | 0  |
| k__Bacteria;p__Epsilonbacteraeota;c__Campylobacteria;o__Campylobacterales             | 0    | 168   | 16    | 577   | 43   | 0  |
| k__Bacteria;p__Firmicutes;c__Bacilli;o__Bacillales                                    | 510  | 1002  | 53327 | 12389 | 3457 | 9  |
| k__Bacteria;p__Firmicutes;c__Bacilli;o__Lactobacillales                               | 5637 | 10579 | 2679  | 8389  | 4119 | 13 |
| k__Bacteria;p__Firmicutes;c__Clostridia;o__Clostridiales                              | 1372 | 7890  | 1608  | 4445  | 4975 | 11 |
| k__Bacteria;p__Firmicutes;c__Clostridia;o__DTU014                                     | 0    | 0     | 0     | 0     | 11   | 0  |
| k__Bacteria;p__Firmicutes;c__Erysipelotrichia;o__Erysipelotrichales                   | 95   | 870   | 896   | 1764  | 2257 | 0  |
| k__Bacteria;p__Firmicutes;c__Negativicutes;o__Selenomonadales                         | 315  | 380   | 760   | 552   | 142  | 0  |
| k__Bacteria;p__Fusobacteria;c__Fusobacteriia;o__Fusobacteriales                       | 12   | 0     | 41    | 9     | 11   | 7  |
| k__Bacteria;p__Gemmatimonadetes;c__Gemmatimonadetes;o__Gemmatimonadales               | 0    | 0     | 0     | 0     | 6    | 0  |
| k__Bacteria;p__Kiritimatiellaeota;c__Kiritimatiellae;o__WCHB1-41                      | 0    | 0     | 2     | 0     | 0    | 0  |
| k__Bacteria;p__Nitrospirae;c__Nitrospira;o__Nitrospirales                             | 0    | 0     | 6     | 0     | 3    | 0  |

|                                                                             |       |       |       |      |       |    |
|-----------------------------------------------------------------------------|-------|-------|-------|------|-------|----|
| k__Bacteria;p__Patescibacteria;c__Saccharimonadia;o__Saccharimonadales      | 1625  | 10373 | 939   | 2379 | 2372  | 0  |
| k__Bacteria;p__Planctomycetes;c__Phycisphaerae;o__Phycisphaerales           | 59    | 0     | 37    | 14   | 46    | 0  |
| k__Bacteria;p__Planctomycetes;c__Planctomycetacia;o__Gemmatales             | 29    | 10    | 44    | 37   | 75    | 0  |
| k__Bacteria;p__Planctomycetes;c__Planctomycetacia;o__Planctomycetales       | 4     | 0     | 0     | 0    | 0     | 0  |
| k__Bacteria;p__Proteobacteria;c__Alphaproteobacteria;o__Acetobacterales     | 3     | 0     | 5     | 0    | 8     | 0  |
| k__Bacteria;p__Proteobacteria;c__Alphaproteobacteria;o__Caulobacterales     | 254   | 76    | 119   | 109  | 242   | 0  |
| k__Bacteria;p__Proteobacteria;c__Alphaproteobacteria;o__Dongiales           | 7     | 0     | 0     | 0    | 0     | 0  |
| k__Bacteria;p__Proteobacteria;c__Alphaproteobacteria;o__Elsterales          | 26    | 14    | 21    | 7    | 19    | 0  |
| k__Bacteria;p__Proteobacteria;c__Alphaproteobacteria;o__Holosporales        | 318   | 147   | 272   | 96   | 239   | 0  |
| k__Bacteria;p__Proteobacteria;c__Alphaproteobacteria;o__Paracaedibacterales | 0     | 0     | 0     | 0    | 13    | 0  |
| k__Bacteria;p__Proteobacteria;c__Alphaproteobacteria;o__Reyranellales       | 15    | 0     | 13    | 5    | 22    | 0  |
| k__Bacteria;p__Proteobacteria;c__Alphaproteobacteria;o__Rhizobiales         | 1003  | 394   | 677   | 634  | 1056  | 25 |
| k__Bacteria;p__Proteobacteria;c__Alphaproteobacteria;o__Rhodobacterales     | 532   | 117   | 282   | 11   | 47    | 4  |
| k__Bacteria;p__Proteobacteria;c__Alphaproteobacteria;o__Rhodospirillales    | 48    | 117   | 13    | 150  | 91    | 0  |
| k__Bacteria;p__Proteobacteria;c__Alphaproteobacteria;o__Rickettsiales       | 33    | 55    | 33    | 123  | 36    | 0  |
| k__Bacteria;p__Proteobacteria;c__Alphaproteobacteria;o__Sneathiellales      | 67    | 7     | 79    | 42   | 82    | 0  |
| k__Bacteria;p__Proteobacteria;c__Alphaproteobacteria;o__Sphingomonadales    | 30627 | 8318  | 21204 | 9876 | 33493 | 10 |
| k__Bacteria;p__Proteobacteria;c__Alphaproteobacteria;o__Tistrellales        | 8     | 0     | 13    | 0    | 0     | 0  |
| k__Bacteria;p__Proteobacteria;c__Alphaproteobacteria;o__uncultured          | 14    | 0     | 16    | 0    | 13    | 0  |
| k__Bacteria;p__Proteobacteria;c__Deltaproteobacteria;o__Bdellovibrionales   | 3     | 0     | 0     | 0    | 3     | 0  |
| k__Bacteria;p__Proteobacteria;c__Deltaproteobacteria;o__Desulfarcucales     | 10    | 0     | 0     | 0    | 0     | 0  |
| k__Bacteria;p__Proteobacteria;c__Deltaproteobacteria;o__Desulfobacterales   | 0     | 0     | 0     | 0    | 8     | 3  |
| k__Bacteria;p__Proteobacteria;c__Deltaproteobacteria;o__Desulfovibrionales  | 0     | 367   | 56    | 265  | 387   | 0  |
| k__Bacteria;p__Proteobacteria;c__Deltaproteobacteria;o__Desulfuromonadales  | 0     | 0     | 0     | 0    | 8     | 9  |
| k__Bacteria;p__Proteobacteria;c__Deltaproteobacteria;o__MBNT15              | 0     | 0     | 7     | 0    | 0     | 0  |
| k__Bacteria;p__Proteobacteria;c__Deltaproteobacteria;o__Myxococcales        | 0     | 2     | 0     | 0    | 0     | 0  |
| k__Bacteria;p__Proteobacteria;c__Gammaproteobacteria;o__Aeromonadales       | 49    | 184   | 36    | 4    | 0     | 0  |

|                                                                                            |     |       |     |     |     |    |
|--------------------------------------------------------------------------------------------|-----|-------|-----|-----|-----|----|
| k__Bacteria;p__Proteobacteria;c__Gammaproteobacteria;o__Alteromonadales                    | 14  | 34    | 0   | 0   | 4   | 2  |
| k__Bacteria;p__Proteobacteria;c__Gammaproteobacteria;o__Betaproteobacteriales              | 482 | 1259  | 450 | 259 | 367 | 81 |
| k__Bacteria;p__Proteobacteria;c__Gammaproteobacteria;o__Cardiobacteriales                  | 0   | 0     | 0   | 0   | 5   | 0  |
| k__Bacteria;p__Proteobacteria;c__Gammaproteobacteria;o__Cellvibrionales                    | 0   | 0     | 0   | 7   | 3   | 0  |
| k__Bacteria;p__Proteobacteria;c__Gammaproteobacteria;o__Diplorickettsiales                 | 0   | 10    | 15  | 0   | 6   | 0  |
| k__Bacteria;p__Proteobacteria;c__Gammaproteobacteria;o__EPR3968-O8a-Bc78                   | 0   | 0     | 0   | 0   | 7   | 0  |
| k__Bacteria;p__Proteobacteria;c__Gammaproteobacteria;o__Enterobacteriales                  | 225 | 27    | 69  | 238 | 115 | 5  |
| k__Bacteria;p__Proteobacteria;c__Gammaproteobacteria;o__Gammaproteobacteria Incertae Sedis | 53  | 11    | 31  | 15  | 46  | 0  |
| k__Bacteria;p__Proteobacteria;c__Gammaproteobacteria;o__Legionellales                      | 0   | 0     | 0   | 0   | 13  | 0  |
| k__Bacteria;p__Proteobacteria;c__Gammaproteobacteria;o__Oceanospirillales                  | 14  | 3188  | 14  | 3   | 7   | 0  |
| k__Bacteria;p__Proteobacteria;c__Gammaproteobacteria;o__Orbales                            | 0   | 2     | 0   | 0   | 0   | 0  |
| k__Bacteria;p__Proteobacteria;c__Gammaproteobacteria;o__Pasteurellales                     | 5   | 34    | 144 | 7   | 20  | 0  |
| k__Bacteria;p__Proteobacteria;c__Gammaproteobacteria;o__Pseudomonadales                    | 527 | 11462 | 826 | 166 | 798 | 0  |
| k__Bacteria;p__Proteobacteria;c__Gammaproteobacteria;o__Salinisphaerales                   | 18  | 0     | 14  | 0   | 37  | 0  |
| k__Bacteria;p__Proteobacteria;c__Gammaproteobacteria;o__Vibrionales                        | 0   | 0     | 17  | 0   | 0   | 0  |
| k__Bacteria;p__Proteobacteria;c__Gammaproteobacteria;o__Xanthomonadales                    | 83  | 57    | 33  | 0   | 37  | 10 |
| k__Bacteria;p__Proteobacteria;c__Gammaproteobacteria;o__uncultured                         | 4   | 0     | 4   | 0   | 4   | 0  |
| k__Bacteria;p__Proteobacteria;c__Gammaproteobacteria;__                                    | 0   | 0     | 4   | 0   | 0   | 0  |
| k__Bacteria;p__Spirochaetes;c__Spirochaetia;o__Spirochaetales                              | 12  | 74    | 15  | 62  | 33  | 0  |
| k__Bacteria;p__Synergistetes;c__Synergistia;o__Synergistales                               | 8   | 0     | 0   | 0   | 0   | 0  |
| k__Bacteria;p__Tenericutes;c__Mollicutes;o__Anaeroplasmatales                              | 37  | 47    | 11  | 137 | 29  | 0  |
| k__Bacteria;p__Tenericutes;c__Mollicutes;o__Izimaplasmatales                               | 0   | 38    | 0   | 0   | 0   | 0  |
| k__Bacteria;p__Tenericutes;c__Mollicutes;o__Mollicutes RF39                                | 10  | 85    | 3   | 40  | 58  | 0  |
| k__Bacteria;p__Tenericutes;c__Mollicutes;o__Mycoplasmatales                                | 22  | 17    | 10  | 46  | 5   | 0  |
| k__Bacteria;p__Verrucomicrobia;c__Verrucomicrobiae;o__Opitutales                           | 0   | 15    | 0   | 14  | 6   | 0  |
| k__Bacteria;p__Verrucomicrobia;c__Verrucomicrobiae;o__Pedosphaerales                       | 0   | 0     | 0   | 5   | 0   | 0  |

|                                                                          |   |   |    |      |       |   |
|--------------------------------------------------------------------------|---|---|----|------|-------|---|
| k__Bacteria;p__Verrucomicrobia;c__Verrucomicrobiae;o__Verrucomicrobiales | 0 | 0 | 40 | 1821 | 14231 | 5 |
| k__Bacteria;__;__;__                                                     | 3 | 5 | 0  | 2    | 10    | 0 |
| Unassigned;__;__;__                                                      | 9 | 5 | 2  | 6    | 13    | 0 |

### 7. Table S6 Family-level taxon distribution of the reads count obtained

| #OTU ID                                                                                             | Contro<br>1 | DMH | DMH<br>+<br>Inulin | DMH<br>+ L.<br>casei | DMH<br>+ L.<br>casei +<br>Inulin | Seque<br>ncing<br>control |
|-----------------------------------------------------------------------------------------------------|-------------|-----|--------------------|----------------------|----------------------------------|---------------------------|
| k__Bacteria;p__Acidobacteria;c__Acidobacteriia;o__Solibacterales;f__Solibacteraceae<br>(Subgroup 3) | 21          | 0   | 0                  | 0                    | 0                                | 0                         |
| k__Bacteria;p__Acidobacteria;c__Blastocatellia (Subgroup 4);o__11-24;__                             | 0           | 0   | 0                  | 0                    | 4                                | 0                         |
| k__Bacteria;p__Acidobacteria;c__Subgroup 6;__;__                                                    | 0           | 0   | 0                  | 0                    | 9                                | 0                         |
| k__Bacteria;p__Actinobacteria;c__Acidimicrobiia;o__Microtrichales;f__Iamiaceae                      | 9           | 0   | 0                  | 0                    | 0                                | 0                         |
| k__Bacteria;p__Actinobacteria;c__Acidimicrobiia;o__Microtrichales;f__Ilumatobacteraceae             | 0           | 0   | 0                  | 2                    | 0                                | 0                         |
| k__Bacteria;p__Actinobacteria;c__Acidimicrobiia;o__Microtrichales;f__Microtrichaceae                | 2           | 0   | 0                  | 0                    | 0                                | 0                         |
| k__Bacteria;p__Actinobacteria;c__Acidimicrobiia;o__Microtrichales;f__uncultured                     | 3           | 0   | 7                  | 0                    | 0                                | 0                         |
| k__Bacteria;p__Actinobacteria;c__Actinobacteria;o__Actinomycetales;f__Actinomycetaceae              | 20          | 0   | 120                | 0                    | 16                               | 0                         |
| k__Bacteria;p__Actinobacteria;c__Actinobacteria;o__Bifidobacteriales;f__Bifidobacteriaceae          | 14          | 2   | 26                 | 11                   | 6                                | 0                         |
| k__Bacteria;p__Actinobacteria;c__Actinobacteria;o__Corynebacteriales;f__Corynebacteriaceae          | 118         | 176 | 320                | 36                   | 310                              | 5                         |
| k__Bacteria;p__Actinobacteria;c__Actinobacteria;o__Corynebacteriales;f__Dietziaceae                 | 9           | 0   | 13                 | 0                    | 120                              | 0                         |
| k__Bacteria;p__Actinobacteria;c__Actinobacteria;o__Corynebacteriales;f__Mycobacteriaceae            | 0           | 0   | 0                  | 0                    | 13                               | 0                         |

|                                                                                                   |      |      |     |      |      |   |
|---------------------------------------------------------------------------------------------------|------|------|-----|------|------|---|
| k_Bacteria;p_Actinobacteria;c_Actinobacteria;o_Corynebacteriales;f_Nocardiaceae                   | 11   | 0    | 0   | 0    | 8    | 7 |
| k_Bacteria;p_Actinobacteria;c_Actinobacteria;o_Frankiales;f_Cryptosporangiaceae                   | 0    | 0    | 0   | 0    | 4    | 0 |
| k_Bacteria;p_Actinobacteria;c_Actinobacteria;o_Frankiales;f_Geodermatophilaceae                   | 14   | 0    | 0   | 0    | 0    | 0 |
| k_Bacteria;p_Actinobacteria;c_Actinobacteria;o_Frankiales;__                                      | 0    | 2    | 0   | 0    | 0    | 0 |
| k_Bacteria;p_Actinobacteria;c_Actinobacteria;o_Micrococcales;f_Brevibacteriaceae                  | 16   | 0    | 0   | 6    | 24   | 0 |
| k_Bacteria;p_Actinobacteria;c_Actinobacteria;o_Micrococcales;f_Cellulomonadaceae                  | 0    | 0    | 25  | 0    | 15   | 0 |
| k_Bacteria;p_Actinobacteria;c_Actinobacteria;o_Micrococcales;f_Dermabacteraceae                   | 49   | 14   | 23  | 14   | 57   | 0 |
| k_Bacteria;p_Actinobacteria;c_Actinobacteria;o_Micrococcales;f_Dermatophilaceae                   | 7    | 0    | 5   | 0    | 7    | 0 |
| k_Bacteria;p_Actinobacteria;c_Actinobacteria;o_Micrococcales;f_Intrasporangiaceae                 | 72   | 11   | 18  | 22   | 109  | 0 |
| k_Bacteria;p_Actinobacteria;c_Actinobacteria;o_Micrococcales;f_Microbacteriaceae                  | 37   | 20   | 16  | 0    | 25   | 0 |
| k_Bacteria;p_Actinobacteria;c_Actinobacteria;o_Micrococcales;f_Micrococcaceae                     | 175  | 27   | 433 | 51   | 148  | 0 |
| k_Bacteria;p_Actinobacteria;c_Actinobacteria;o_Micrococcales;f_Ruaniaceae                         | 5    | 0    | 0   | 0    | 0    | 0 |
| k_Bacteria;p_Actinobacteria;c_Actinobacteria;o_Micrococcales;__                                   | 8    | 4    | 6   | 0    | 12   | 0 |
| k_Bacteria;p_Actinobacteria;c_Actinobacteria;o_Micromonosporales;f_Micromonosporaceae             | 8    | 0    | 0   | 0    | 0    | 0 |
| k_Bacteria;p_Actinobacteria;c_Actinobacteria;o_Propionibacteriales;f_Nocardioideaceae             | 17   | 0    | 6   | 8    | 7    | 0 |
| k_Bacteria;p_Actinobacteria;c_Actinobacteria;o_Propionibacteriales;f_Propionibacteriaceae         | 118  | 30   | 208 | 38   | 154  | 0 |
| k_Bacteria;p_Actinobacteria;c_Actinobacteria;o_Pseudonocardiales;f_Pseudonocardiaceae             | 4    | 0    | 0   | 0    | 3    | 0 |
| k_Bacteria;p_Actinobacteria;c_Coriobacteriia;o_Coriobacteriales;f_Atopobiaceae                    | 39   | 343  | 64  | 164  | 170  | 0 |
| k_Bacteria;p_Actinobacteria;c_Coriobacteriia;o_Coriobacteriales;f_Coriobacteriales Incertae Sedis | 0    | 11   | 0   | 5    | 13   | 0 |
| k_Bacteria;p_Actinobacteria;c_Coriobacteriia;o_Coriobacteriales;f_Eggerthellaceae                 | 206  | 1498 | 128 | 470  | 559  | 0 |
| k_Bacteria;p_Actinobacteria;c_Coriobacteriia;o_Coriobacteriales;f_uncultured                      | 5    | 151  | 53  | 114  | 93   | 0 |
| k_Bacteria;p_Actinobacteria;c_Nitrliruptoria;o_Nitrliruptorales;f_Nitrliruptoraceae               | 0    | 0    | 0   | 2    | 0    | 0 |
| k_Bacteria;p_Actinobacteria;c_Thermoleophilia;o_Solirubrobacterales;f_Solirubrobacteraceae        | 5    | 0    | 0   | 0    | 0    | 0 |
| k_Bacteria;p_Bacteroidetes;c_Bacteroidia;o_Bacteroidales;f_Bacteroidaceae                         | 4137 | 6281 | 507 | 8192 | 5143 | 0 |
| k_Bacteria;p_Bacteroidetes;c_Bacteroidia;o_Bacteroidales;f_F082                                   | 0    | 13   | 0   | 13   | 0    | 0 |

|                                                                                     |      |       |      |       |       |    |
|-------------------------------------------------------------------------------------|------|-------|------|-------|-------|----|
| k_Bacteria;p_Bacteroidetes;c_Bacteroidia;o_Bacteroidales;f_Marinifilaceae           | 94   | 1060  | 150  | 877   | 334   | 0  |
| k_Bacteria;p_Bacteroidetes;c_Bacteroidia;o_Bacteroidales;f_Muribaculaceae           | 4396 | 24922 | 5052 | 20220 | 13182 | 0  |
| k_Bacteria;p_Bacteroidetes;c_Bacteroidia;o_Bacteroidales;f_Paludibacteraceae        | 0    | 0     | 0    | 0     | 4     | 0  |
| k_Bacteria;p_Bacteroidetes;c_Bacteroidia;o_Bacteroidales;f_Porphyrimonadaceae       | 0    | 0     | 12   | 0     | 10    | 0  |
| k_Bacteria;p_Bacteroidetes;c_Bacteroidia;o_Bacteroidales;f_Prevotellaceae           | 595  | 7687  | 525  | 4098  | 2937  | 11 |
| k_Bacteria;p_Bacteroidetes;c_Bacteroidia;o_Bacteroidales;f_Prolixibacteraceae       | 0    | 0     | 0    | 0     | 9     | 0  |
| k_Bacteria;p_Bacteroidetes;c_Bacteroidia;o_Bacteroidales;f_Rikenellaceae            | 629  | 4554  | 346  | 3474  | 1463  | 0  |
| k_Bacteria;p_Bacteroidetes;c_Bacteroidia;o_Bacteroidales;f_Rs-E47 termite group     | 7    | 84    | 29   | 428   | 94    | 0  |
| k_Bacteria;p_Bacteroidetes;c_Bacteroidia;o_Bacteroidales;f_Tannerellaceae           | 161  | 9634  | 278  | 1996  | 1357  | 0  |
| k_Bacteria;p_Bacteroidetes;c_Bacteroidia;o_Bacteroidales;f_                         | 8    | 0     | 29   | 0     | 0     | 0  |
| k_Bacteria;p_Bacteroidetes;c_Bacteroidia;o_Chitinophagales;f_Chitinophagaceae       | 53   | 40    | 67   | 49    | 107   | 0  |
| k_Bacteria;p_Bacteroidetes;c_Bacteroidia;o_Chitinophagales;f_Saprospiraceae         | 0    | 0     | 0    | 0     | 11    | 0  |
| k_Bacteria;p_Bacteroidetes;c_Bacteroidia;o_Cytophagales;f_Hymenobacteraceae         | 39   | 0     | 12   | 0     | 0     | 0  |
| k_Bacteria;p_Bacteroidetes;c_Bacteroidia;o_Cytophagales;f_Spirosomaceae             | 269  | 62    | 18   | 59    | 277   | 0  |
| k_Bacteria;p_Bacteroidetes;c_Bacteroidia;o_Flavobacteriales;f_Flavobacteriaceae     | 41   | 147   | 26   | 16    | 42    | 3  |
| k_Bacteria;p_Bacteroidetes;c_Bacteroidia;o_Flavobacteriales;f_Weeksellaceae         | 56   | 18    | 51   | 8     | 63    | 0  |
| k_Bacteria;p_Bacteroidetes;c_Bacteroidia;o_Sphingobacteriales;f_CMW-169             | 0    | 0     | 0    | 0     | 0     | 3  |
| k_Bacteria;p_Bacteroidetes;c_Bacteroidia;o_Sphingobacteriales;f_Lentimicrobiaceae   | 13   | 0     | 0    | 0     | 0     | 0  |
| k_Bacteria;p_Bacteroidetes;c_Bacteroidia;o_Sphingobacteriales;f_Sphingobacteriaceae | 46   | 22    | 31   | 9     | 29    | 0  |
| k_Bacteria;p_Bacteroidetes;c_Bacteroidia;o_Sphingobacteriales;f_env.OPS 17          | 33   | 7     | 28   | 14    | 39    | 0  |
| k_Bacteria;p_Chlamydiae;c_Chlamydiae;o_Chlamydiales;f_Chlamydiaceae                 | 0    | 0     | 0    | 0     | 14    | 0  |
| k_Bacteria;p_Chlamydiae;c_Chlamydiae;o_Chlamydiales;f_Simkaniaceae                  | 49   | 8     | 21   | 10    | 40    | 0  |
| k_Bacteria;p_Chloroflexi;c_Anaerolineae;o_Caldilineales;f_Caldilineaceae            | 0    | 0     | 0    | 0     | 11    | 0  |
| k_Bacteria;p_Chloroflexi;c_Anaerolineae;o_RBG-13-54-9;f_uncultured bacterium        | 0    | 0     | 0    | 0     | 3     | 0  |
| k_Bacteria;p_Chloroflexi;c_Anaerolineae;f_                                          | 6    | 0     | 0    | 0     | 0     | 0  |
| k_Bacteria;p_Chloroflexi;c_Chloroflexia;o_Chloroflexales;f_Chloroflexaceae          | 3    | 0     | 0    | 0     | 0     | 0  |
| k_Bacteria;p_Chloroflexi;c_Chloroflexia;o_Thermomicrobiales;f_JG30-KF-CM45          | 0    | 0     | 0    | 7     | 24    | 0  |

|                                                                                                                    |      |     |       |     |     |   |
|--------------------------------------------------------------------------------------------------------------------|------|-----|-------|-----|-----|---|
| k__Bacteria;p__Chloroflexi;c__Gitt-GS-136;o__uncultured bacterium;f__uncultured bacterium                          | 7    | 0   | 0     | 0   | 0   | 0 |
| k__Bacteria;p__Chloroflexi;c__Gitt-GS-136;__;__                                                                    | 0    | 3   | 5     | 0   | 0   | 0 |
| k__Bacteria;p__Coprothermobacteraeota;c__Coprothermobacteria;o__Coprothermobacterales;f__Coprothermobacteraceae    | 0    | 0   | 4     | 0   | 5   | 0 |
| k__Bacteria;p__Cyanobacteria;c__Melainabacteria;o__Gastranaerophilales;f__uncultured bacterium                     | 0    | 19  | 0     | 15  | 55  | 0 |
| k__Bacteria;p__Cyanobacteria;c__Melainabacteria;o__Gastranaerophilales;f__uncultured rumen bacterium               | 9    | 20  | 0     | 0   | 0   | 0 |
| k__Bacteria;p__Cyanobacteria;c__Melainabacteria;o__Gastranaerophilales;__;__                                       | 28   | 17  | 2     | 14  | 35  | 0 |
| k__Bacteria;p__Cyanobacteria;c__Melainabacteria;o__Obscuribacterales;f__uncultured bacterium                       | 29   | 9   | 38    | 3   | 57  | 0 |
| k__Bacteria;p__Cyanobacteria;c__Melainabacteria;o__Obscuribacterales;__;__                                         | 141  | 33  | 28    | 36  | 180 | 0 |
| k__Bacteria;p__Cyanobacteria;c__Oxyphotobacteria;o__Chloroplast;f__Aegyptius monachus (black vulture)              | 0    | 0   | 20    | 0   | 0   | 0 |
| k__Bacteria;p__Cyanobacteria;c__Oxyphotobacteria;o__Chloroplast;f__Poterioochromonas sp. DS                        | 1118 | 273 | 1325  | 303 | 518 | 0 |
| k__Bacteria;p__Cyanobacteria;c__Oxyphotobacteria;o__Chloroplast;__;__                                              | 793  | 164 | 260   | 121 | 796 | 4 |
| k__Bacteria;p__Dadabacteria;c__Dadabacteriia;o__Dadabacteriales;f__uncultured candidate division SBR1093 bacterium | 13   | 0   | 7     | 0   | 14  | 0 |
| k__Bacteria;p__Deferribacteres;c__Deferribacteres;o__Deferribacterales;f__Deferribacteraceae                       | 0    | 38  | 0     | 52  | 13  | 0 |
| k__Bacteria;p__Deinococcus-Thermus;c__Deinococci;o__Deinococcales;f__Deinococcaceae                                | 0    | 0   | 6     | 0   | 0   | 0 |
| k__Bacteria;p__Deinococcus-Thermus;c__Deinococci;o__Deinococcales;f__Trueperaceae                                  | 0    | 0   | 0     | 0   | 4   | 0 |
| k__Bacteria;p__Deinococcus-Thermus;c__Deinococci;o__Thermales;f__Thermaceae                                        | 14   | 3   | 0     | 0   | 5   | 0 |
| k__Bacteria;p__Epsilonbacteraeota;c__Campylobacteria;o__Campylobacterales;f__Arcobacteraceae                       | 0    | 0   | 5     | 0   | 0   | 0 |
| k__Bacteria;p__Epsilonbacteraeota;c__Campylobacteria;o__Campylobacterales;f__Campylobacteraceae                    | 0    | 0   | 7     | 0   | 0   | 0 |
| k__Bacteria;p__Epsilonbacteraeota;c__Campylobacteria;o__Campylobacterales;f__Helicobacteraceae                     | 0    | 168 | 4     | 577 | 43  | 0 |
| k__Bacteria;p__Firmicutes;c__Bacilli;o__Bacillales;f__Alicyclobacillaceae                                          | 0    | 5   | 0     | 0   | 0   | 0 |
| k__Bacteria;p__Firmicutes;c__Bacilli;o__Bacillales;f__Bacillaceae                                                  | 84   | 38  | 51317 | 35  | 74  | 0 |

|                                                                                       |      |      |      |       |      |    |
|---------------------------------------------------------------------------------------|------|------|------|-------|------|----|
| k_Bacteria;p_Firmicutes;c_Bacilli;o_Bacillales;f_Family XI                            | 16   | 0    | 114  | 12    | 13   | 0  |
| k_Bacteria;p_Firmicutes;c_Bacilli;o_Bacillales;f_Family XII                           | 18   | 0    | 13   | 4     | 17   | 0  |
| k_Bacteria;p_Firmicutes;c_Bacilli;o_Bacillales;f_Paenibacillaceae                     | 0    | 0    | 1173 | 12255 | 3    | 0  |
| k_Bacteria;p_Firmicutes;c_Bacilli;o_Bacillales;f_Planococcaceae                       | 52   | 15   | 69   | 32    | 2946 | 9  |
| k_Bacteria;p_Firmicutes;c_Bacilli;o_Bacillales;f_Staphylococcaceae                    | 340  | 944  | 636  | 49    | 404  | 0  |
| k_Bacteria;p_Firmicutes;c_Bacilli;o_Bacillales;f_Thermoactinomycetaceae               | 0    | 0    | 5    | 2     | 0    | 0  |
| k_Bacteria;p_Firmicutes;c_Bacilli;o_Lactobacillales;f_Aerococcaceae                   | 22   | 2575 | 94   | 16    | 62   | 0  |
| k_Bacteria;p_Firmicutes;c_Bacilli;o_Lactobacillales;f_Carnobacteriaceae               | 67   | 42   | 113  | 6     | 756  | 0  |
| k_Bacteria;p_Firmicutes;c_Bacilli;o_Lactobacillales;f_Enterococcaceae                 | 8    | 20   | 0    | 23    | 9    | 0  |
| k_Bacteria;p_Firmicutes;c_Bacilli;o_Lactobacillales;f_Lactobacillaceae                | 5179 | 5985 | 571  | 7530  | 2482 | 13 |
| k_Bacteria;p_Firmicutes;c_Bacilli;o_Lactobacillales;f_Leuconostocaceae                | 13   | 5    | 18   | 5     | 10   | 0  |
| k_Bacteria;p_Firmicutes;c_Bacilli;o_Lactobacillales;f_Streptococcaceae                | 336  | 1952 | 1851 | 809   | 800  | 0  |
| k_Bacteria;p_Firmicutes;c_Bacilli;o_Lactobacillales;f_                                | 12   | 0    | 32   | 0     | 0    | 0  |
| k_Bacteria;p_Firmicutes;c_Clostridia;o_Clostridiales;f_Christensenellaceae            | 20   | 3    | 4    | 3     | 6    | 0  |
| k_Bacteria;p_Firmicutes;c_Clostridia;o_Clostridiales;f_Clostridiaceae 1               | 55   | 59   | 276  | 276   | 37   | 0  |
| k_Bacteria;p_Firmicutes;c_Clostridia;o_Clostridiales;f_Clostridiaceae 4               | 0    | 0    | 6    | 0     | 0    | 0  |
| k_Bacteria;p_Firmicutes;c_Clostridia;o_Clostridiales;f_Clostridiales vadinBB60 group  | 21   | 406  | 31   | 153   | 98   | 0  |
| k_Bacteria;p_Firmicutes;c_Clostridia;o_Clostridiales;f_Defluviitaleaceae              | 0    | 15   | 0    | 0     | 5    | 0  |
| k_Bacteria;p_Firmicutes;c_Clostridia;o_Clostridiales;f_Family XI                      | 9    | 3    | 52   | 0     | 4    | 0  |
| k_Bacteria;p_Firmicutes;c_Clostridia;o_Clostridiales;f_Family XIII                    | 3    | 3    | 13   | 13    | 30   | 0  |
| k_Bacteria;p_Firmicutes;c_Clostridia;o_Clostridiales;f_Lachnospiraceae                | 247  | 1145 | 169  | 786   | 879  | 0  |
| k_Bacteria;p_Firmicutes;c_Clostridia;o_Clostridiales;f_Peptococcaceae                 | 2    | 84   | 16   | 71    | 24   | 0  |
| k_Bacteria;p_Firmicutes;c_Clostridia;o_Clostridiales;f_Peptostreptococcaceae          | 22   | 209  | 65   | 68    | 287  | 0  |
| k_Bacteria;p_Firmicutes;c_Clostridia;o_Clostridiales;f_Ruminococcaceae                | 993  | 5963 | 976  | 3075  | 3605 | 11 |
| k_Bacteria;p_Firmicutes;c_Clostridia;o_DTU014;f_uncultured bacterium                  | 0    | 0    | 0    | 0     | 11   | 0  |
| k_Bacteria;p_Firmicutes;c_Erysipelotrichia;o_Erysipelotrichales;f_Erysipelotrichaceae | 95   | 870  | 896  | 1764  | 2257 | 0  |
| k_Bacteria;p_Firmicutes;c_Negativicutes;o_Selenomonadales;f_Veillonellaceae           | 315  | 380  | 760  | 552   | 142  | 0  |



|                                                                                                |      |       |     |      |      |    |
|------------------------------------------------------------------------------------------------|------|-------|-----|------|------|----|
| k_Bacteria;p_Fusobacteria;c_Fusobacteriia;o_Fusobacteriales;f_Fusobacteriaceae                 | 5    | 0     | 0   | 9    | 0    | 7  |
| k_Bacteria;p_Fusobacteria;c_Fusobacteriia;o_Fusobacteriales;f_Leptotrichiaceae                 | 7    | 0     | 41  | 0    | 11   | 0  |
| k_Bacteria;p_Gemmatimonadetes;c_Gemmatimonadetes;o_Gemmatimonadales;f_Gemmatimonadaceae        | 0    | 0     | 0   | 0    | 6    | 0  |
| k_Bacteria;p_Kiritimatiellaeota;c_Kiritimatiellae;o_WCHB1-41;f_uncultured bacterium            | 0    | 0     | 2   | 0    | 0    | 0  |
| k_Bacteria;p_Nitrospirae;c_Nitrospira;o_Nitrospirales;f_Nitrospiraceae                         | 0    | 0     | 6   | 0    | 3    | 0  |
| k_Bacteria;p_Patescibacteria;c_Saccharimonadia;o_Saccharimonadales;f_Saccharimonadaceae        | 1625 | 10371 | 939 | 2377 | 2372 | 0  |
| k_Bacteria;p_Patescibacteria;c_Saccharimonadia;o_Saccharimonadales;__                          | 0    | 2     | 0   | 2    | 0    | 0  |
| k_Bacteria;p_Planctomycetes;c_Phycisphaerae;o_Phycisphaerales;f_Phycisphaeraceae               | 59   | 0     | 37  | 14   | 46   | 0  |
| k_Bacteria;p_Planctomycetes;c_Planctomycetacia;o_Gemmatales;f_Gemmataceae                      | 29   | 10    | 44  | 37   | 75   | 0  |
| k_Bacteria;p_Planctomycetes;c_Planctomycetacia;o_Planctomycetales;f_uncultured                 | 4    | 0     | 0   | 0    | 0    | 0  |
| k_Bacteria;p_Proteobacteria;c_Alphaproteobacteria;o_Acetobacterales;f_Acetobacteraceae         | 3    | 0     | 5   | 0    | 8    | 0  |
| k_Bacteria;p_Proteobacteria;c_Alphaproteobacteria;o_Caulobacterales;f_Caulobacteraceae         | 254  | 76    | 119 | 109  | 238  | 0  |
| k_Bacteria;p_Proteobacteria;c_Alphaproteobacteria;o_Caulobacterales;f_Hyphomonadaceae          | 0    | 0     | 0   | 0    | 4    | 0  |
| k_Bacteria;p_Proteobacteria;c_Alphaproteobacteria;o_Dongiales;f_Dongiaceae                     | 7    | 0     | 0   | 0    | 0    | 0  |
| k_Bacteria;p_Proteobacteria;c_Alphaproteobacteria;o_Elsterales;f_Elsteraceae                   | 26   | 14    | 21  | 7    | 19   | 0  |
| k_Bacteria;p_Proteobacteria;c_Alphaproteobacteria;o_Holosporales;f_Holosporaceae               | 318  | 147   | 272 | 96   | 239  | 0  |
| k_Bacteria;p_Proteobacteria;c_Alphaproteobacteria;o_Paracaedibacterales;f_Paracaedibacteraceae | 0    | 0     | 0   | 0    | 13   | 0  |
| k_Bacteria;p_Proteobacteria;c_Alphaproteobacteria;o_Reyranellales;f_Reyranellaceae             | 15   | 0     | 13  | 5    | 22   | 0  |
| k_Bacteria;p_Proteobacteria;c_Alphaproteobacteria;o_Rhizobiales;f_Beijerinckiaceae             | 722  | 295   | 356 | 489  | 834  | 0  |
| k_Bacteria;p_Proteobacteria;c_Alphaproteobacteria;o_Rhizobiales;f_Devisiaceae                  | 3    | 0     | 0   | 0    | 0    | 0  |
| k_Bacteria;p_Proteobacteria;c_Alphaproteobacteria;o_Rhizobiales;f_Hyphomicrobiaceae            | 0    | 0     | 0   | 0    | 6    | 0  |
| k_Bacteria;p_Proteobacteria;c_Alphaproteobacteria;o_Rhizobiales;f_Kaistiaceae                  | 109  | 11    | 66  | 30   | 60   | 0  |
| k_Bacteria;p_Proteobacteria;c_Alphaproteobacteria;o_Rhizobiales;f_Labraceae                    | 7    | 5     | 0   | 4    | 10   | 0  |
| k_Bacteria;p_Proteobacteria;c_Alphaproteobacteria;o_Rhizobiales;f_Rhizobiaceae                 | 69   | 44    | 60  | 15   | 57   | 25 |

|                                                                                                   |       |      |       |      |       |    |
|---------------------------------------------------------------------------------------------------|-------|------|-------|------|-------|----|
| k__Bacteria;p__Proteobacteria;c__Alphaproteobacteria;o__Rhizobiales;f__Rhizobiales Incertae Sedis | 0     | 0    | 0     | 5    | 2     | 0  |
| k__Bacteria;p__Proteobacteria;c__Alphaproteobacteria;o__Rhizobiales;f__Xanthobacteraceae          | 93    | 39   | 195   | 91   | 87    | 0  |
| k__Bacteria;p__Proteobacteria;c__Alphaproteobacteria;o__Rhodobacterales;f__Rhodobacteraceae       | 532   | 117  | 282   | 11   | 47    | 4  |
| k__Bacteria;p__Proteobacteria;c__Alphaproteobacteria;o__Rhodospirillales;f__Rhodospirillaceae     | 29    | 0    | 0     | 0    | 12    | 0  |
| k__Bacteria;p__Proteobacteria;c__Alphaproteobacteria;o__Rhodospirillales;f__Rhodospirillaceae     | 0     | 0    | 6     | 0    | 0     | 0  |
| k__Bacteria;p__Proteobacteria;c__Alphaproteobacteria;o__Rhodospirillales;f__uncultured            | 19    | 117  | 7     | 150  | 79    | 0  |
| k__Bacteria;p__Proteobacteria;c__Alphaproteobacteria;o__Rickettsiales;f__Mitochondria             | 17    | 19   | 16    | 30   | 18    | 0  |
| k__Bacteria;p__Proteobacteria;c__Alphaproteobacteria;o__Rickettsiales;f__uncultured               | 16    | 36   | 17    | 93   | 18    | 0  |
| k__Bacteria;p__Proteobacteria;c__Alphaproteobacteria;o__Sneathiellales;f__Sneathiellaceae         | 67    | 7    | 79    | 42   | 82    | 0  |
| k__Bacteria;p__Proteobacteria;c__Alphaproteobacteria;o__Sphingomonadales;f__Sphingomonadaceae     | 30627 | 8318 | 21204 | 9876 | 33493 | 10 |
| k__Bacteria;p__Proteobacteria;c__Alphaproteobacteria;o__Tistrellales;f__Geminicoccaceae           | 8     | 0    | 13    | 0    | 0     | 0  |
| k__Bacteria;p__Proteobacteria;c__Alphaproteobacteria;o__uncultured;__                             | 14    | 0    | 16    | 0    | 13    | 0  |
| k__Bacteria;p__Proteobacteria;c__Deltaproteobacteria;o__Bdellovibrionales;f__Bacteriovoraceae     | 0     | 0    | 0     | 0    | 3     | 0  |
| k__Bacteria;p__Proteobacteria;c__Deltaproteobacteria;o__Bdellovibrionales;f__Bdellovibrionaceae   | 3     | 0    | 0     | 0    | 0     | 0  |
| k__Bacteria;p__Proteobacteria;c__Deltaproteobacteria;o__Desulfarculales;f__Desulfarculaceae       | 10    | 0    | 0     | 0    | 0     | 0  |
| k__Bacteria;p__Proteobacteria;c__Deltaproteobacteria;o__Desulfobacterales;f__Desulfobulbaceae     | 0     | 0    | 0     | 0    | 8     | 3  |
| k__Bacteria;p__Proteobacteria;c__Deltaproteobacteria;o__Desulfovibrionales;f__Desulfovibrionaceae | 0     | 367  | 56    | 265  | 387   | 0  |
| k__Bacteria;p__Proteobacteria;c__Deltaproteobacteria;o__Desulfuromonadales;f__Geobacteraceae      | 0     | 0    | 0     | 0    | 8     | 9  |
| k__Bacteria;p__Proteobacteria;c__Deltaproteobacteria;o__MBNT15;f__delta proteobacterium WX152     | 0     | 0    | 7     | 0    | 0     | 0  |
| k__Bacteria;p__Proteobacteria;c__Deltaproteobacteria;o__Myxococcales;f__Blfdi19                   | 0     | 2    | 0     | 0    | 0     | 0  |
| k__Bacteria;p__Proteobacteria;c__Gammaproteobacteria;o__Aeromonadales;f__Aeromonadaceae           | 49    | 184  | 36    | 4    | 0     | 0  |

|                                                                                                                 |     |      |     |     |     |    |
|-----------------------------------------------------------------------------------------------------------------|-----|------|-----|-----|-----|----|
| k__Bacteria;p__Proteobacteria;c__Gammaproteobacteria;o__Alteromonadales;f__Alteromonada<br>ceae                 | 9   | 0    | 0   | 0   | 0   | 2  |
| k__Bacteria;p__Proteobacteria;c__Gammaproteobacteria;o__Alteromonadales;f__Idiomarina<br>ceae                   | 0   | 34   | 0   | 0   | 0   | 0  |
| k__Bacteria;p__Proteobacteria;c__Gammaproteobacteria;o__Alteromonadales;f__Marinobactera<br>ceae                | 5   | 0    | 0   | 0   | 0   | 0  |
| k__Bacteria;p__Proteobacteria;c__Gammaproteobacteria;o__Alteromonadales;f__Shewanella<br>ceae                   | 0   | 0    | 0   | 0   | 4   | 0  |
| k__Bacteria;p__Proteobacteria;c__Gammaproteobacteria;o__Betaproteobacteriales;f__Burkhold<br>eriae              | 406 | 1233 | 261 | 239 | 346 | 72 |
| k__Bacteria;p__Proteobacteria;c__Gammaproteobacteria;o__Betaproteobacteriales;f__Hydrogen<br>ophilaceae         | 25  | 0    | 12  | 0   | 0   | 9  |
| k__Bacteria;p__Proteobacteria;c__Gammaproteobacteria;o__Betaproteobacteriales;f__Methylo<br>philaceae           | 7   | 0    | 0   | 3   | 0   | 0  |
| k__Bacteria;p__Proteobacteria;c__Gammaproteobacteria;o__Betaproteobacteriales;f__Neisseria<br>ceae              | 16  | 16   | 156 | 6   | 9   | 0  |
| k__Bacteria;p__Proteobacteria;c__Gammaproteobacteria;o__Betaproteobacteriales;f__Nitrosom<br>onadaceae          | 28  | 5    | 21  | 11  | 8   | 0  |
| k__Bacteria;p__Proteobacteria;c__Gammaproteobacteria;o__Betaproteobacteriales;f__Rhodocyc<br>laceae             | 0   | 0    | 0   | 0   | 4   | 0  |
| k__Bacteria;p__Proteobacteria;c__Gammaproteobacteria;o__Betaproteobacteriales;f__TRA3-20                        | 0   | 5    | 0   | 0   | 0   | 0  |
| k__Bacteria;p__Proteobacteria;c__Gammaproteobacteria;o__Cardiobacteriales;f__Cardiobacteri<br>aceae             | 0   | 0    | 0   | 0   | 5   | 0  |
| k__Bacteria;p__Proteobacteria;c__Gammaproteobacteria;o__Cellvibrionales;f__Cellvibrionacea<br>e                 | 0   | 0    | 0   | 7   | 3   | 0  |
| k__Bacteria;p__Proteobacteria;c__Gammaproteobacteria;o__Diplorickettsiales;f__Diplorickettsi<br>aceae           | 0   | 10   | 15  | 0   | 6   | 0  |
| k__Bacteria;p__Proteobacteria;c__Gammaproteobacteria;o__EPR3968-O8a-Bc78;__                                     | 0   | 0    | 0   | 0   | 7   | 0  |
| k__Bacteria;p__Proteobacteria;c__Gammaproteobacteria;o__Enterobacteriales;f__Enterobacteri<br>aceae             | 225 | 27   | 69  | 238 | 115 | 5  |
| k__Bacteria;p__Proteobacteria;c__Gammaproteobacteria;o__Gammaproteobacteria Incertae<br>Sedis;f__Unknown Family | 53  | 11   | 31  | 15  | 46  | 0  |
| k__Bacteria;p__Proteobacteria;c__Gammaproteobacteria;o__Legionellales;f__Legionellaceae                         | 0   | 0    | 0   | 0   | 13  | 0  |

|                                                                                                      |     |       |     |     |     |   |
|------------------------------------------------------------------------------------------------------|-----|-------|-----|-----|-----|---|
| k__Bacteria;p__Proteobacteria;c__Gammaproteobacteria;o__Oceanospirillales;f__Halomonadaceae          | 14  | 3188  | 14  | 3   | 0   | 0 |
| k__Bacteria;p__Proteobacteria;c__Gammaproteobacteria;o__Oceanospirillales;f__Pseudohongie<br>llaceae | 0   | 0     | 0   | 0   | 7   | 0 |
| k__Bacteria;p__Proteobacteria;c__Gammaproteobacteria;o__Orbales;f__Orbaceae                          | 0   | 2     | 0   | 0   | 0   | 0 |
| k__Bacteria;p__Proteobacteria;c__Gammaproteobacteria;o__Pasteurellales;f__Pasteurellaceae            | 5   | 34    | 144 | 7   | 20  | 0 |
| k__Bacteria;p__Proteobacteria;c__Gammaproteobacteria;o__Pseudomonadales;f__Moraxellaceae             | 220 | 10835 | 811 | 91  | 405 | 0 |
| k__Bacteria;p__Proteobacteria;c__Gammaproteobacteria;o__Pseudomonadales;f__Pseudomona<br>daceae      | 307 | 627   | 15  | 75  | 393 | 0 |
| k__Bacteria;p__Proteobacteria;c__Gammaproteobacteria;o__Salinisphaerales;f__Solimonadacea<br>e       | 18  | 0     | 14  | 0   | 37  | 0 |
| k__Bacteria;p__Proteobacteria;c__Gammaproteobacteria;o__Vibrionales;f__Vibrionaceae                  | 0   | 0     | 17  | 0   | 0   | 0 |
| k__Bacteria;p__Proteobacteria;c__Gammaproteobacteria;o__Xanthomonadales;f__Rhodanobact<br>eraceae    | 18  | 0     | 0   | 0   | 0   | 4 |
| k__Bacteria;p__Proteobacteria;c__Gammaproteobacteria;o__Xanthomonadales;f__Xanthomona<br>daceae      | 65  | 57    | 33  | 0   | 37  | 6 |
| k__Bacteria;p__Proteobacteria;c__Gammaproteobacteria;o__uncultured;f__metagenome                     | 0   | 0     | 0   | 0   | 4   | 0 |
| k__Bacteria;p__Proteobacteria;c__Gammaproteobacteria;o__uncultured;__                                | 4   | 0     | 4   | 0   | 0   | 0 |
| k__Bacteria;p__Proteobacteria;c__Gammaproteobacteria;__;__                                           | 0   | 0     | 4   | 0   | 0   | 0 |
| k__Bacteria;p__Spirochaetes;c__Spirochaetia;o__Spirochaetales;f__Spirochaetaceae                     | 12  | 74    | 15  | 62  | 33  | 0 |
| k__Bacteria;p__Synergistetes;c__Synergistia;o__Synergistales;f__Synergistaceae                       | 8   | 0     | 0   | 0   | 0   | 0 |
| k__Bacteria;p__Tenericutes;c__Mollicutes;o__Anaeroplasmatales;f__Anaeroplasmataceae                  | 37  | 47    | 11  | 137 | 29  | 0 |
| k__Bacteria;p__Tenericutes;c__Mollicutes;o__Izimaplasmatales;f__gut metagenome                       | 0   | 38    | 0   | 0   | 0   | 0 |
| k__Bacteria;p__Tenericutes;c__Mollicutes;o__Mollicutes RF39;f__metagenome                            | 0   | 0     | 0   | 6   | 0   | 0 |
| k__Bacteria;p__Tenericutes;c__Mollicutes;o__Mollicutes RF39;f__uncultured bacterium                  | 0   | 59    | 0   | 21  | 25  | 0 |
| k__Bacteria;p__Tenericutes;c__Mollicutes;o__Mollicutes RF39;__                                       | 10  | 26    | 3   | 13  | 33  | 0 |
| k__Bacteria;p__Tenericutes;c__Mollicutes;o__Mycoplasmatales;f__Mycoplasmataceae                      | 22  | 17    | 10  | 46  | 5   | 0 |
| k__Bacteria;p__Verrucomicrobia;c__Verrucomicrobiae;o__Opitutales;f__Puniceicoccaceae                 | 0   | 15    | 0   | 14  | 6   | 0 |
| k__Bacteria;p__Verrucomicrobia;c__Verrucomicrobiae;o__Pedosphaerales;f__Pedosphaeraceae              | 0   | 0     | 0   | 5   | 0   | 0 |

|                                                                                                 |   |   |    |      |       |   |
|-------------------------------------------------------------------------------------------------|---|---|----|------|-------|---|
| k__Bacteria;p__Verrucomicrobia;c__Verrucomicrobiae;o__Verrucomicrobiales;f__Akkermansia<br>ceae | 0 | 0 | 40 | 1821 | 14231 | 5 |
| k__Bacteria;__;__;__;__                                                                         | 3 | 5 | 0  | 2    | 10    | 0 |
| Unassigned;__;__;__;__                                                                          | 9 | 5 | 2  | 6    | 13    | 0 |

### 8. Table S7 Genus-level taxon distribution of the reads count obtained

| Taxa to genus level                                                                                                     | Control | DMH | DMH + Inulin | DMH + L. casei | DMH + L. casei + Inulin | Sequencing control |
|-------------------------------------------------------------------------------------------------------------------------|---------|-----|--------------|----------------|-------------------------|--------------------|
| k__Bacteria;p__Acidobacteria;c__Acidobacteriia;o__Solibacterales;f__Solibacteraceae (Subgroup 3);g__Bryobacter          | 21      | 0   | 0            | 0              | 0                       | 0                  |
| k__Bacteria;p__Acidobacteria;c__Blastocatellia (Subgroup 4);o__11-24;__;__                                              | 0       | 0   | 0            | 0              | 4                       | 0                  |
| k__Bacteria;p__Acidobacteria;c__Subgroup 6;__;__;__                                                                     | 0       | 0   | 0            | 0              | 9                       | 0                  |
| k__Bacteria;p__Actinobacteria;c__Acidimicrobiia;o__Microtrichales;f__Iamiaceae;g__Iamia                                 | 9       | 0   | 0            | 0              | 0                       | 0                  |
| k__Bacteria;p__Actinobacteria;c__Acidimicrobiia;o__Microtrichales;f__Ilumatobacteraceae;g__uncultured                   | 0       | 0   | 0            | 2              | 0                       | 0                  |
| k__Bacteria;p__Actinobacteria;c__Acidimicrobiia;o__Microtrichales;f__Microtrichaceae;g__uncultured                      | 2       | 0   | 0            | 0              | 0                       | 0                  |
| k__Bacteria;p__Actinobacteria;c__Acidimicrobiia;o__Microtrichales;f__uncultured;g__uncultured Acidimicrobidae bacterium | 0       | 0   | 4            | 0              | 0                       | 0                  |

|                                                                                                                 |     |     |     |    |     |   |
|-----------------------------------------------------------------------------------------------------------------|-----|-----|-----|----|-----|---|
| k__Bacteria;p__Actinobacteria;c__Acidimicrobiia;o__Microtrichales;f__uncultured;__                              | 3   | 0   | 3   | 0  | 0   | 0 |
| k__Bacteria;p__Actinobacteria;c__Actinobacteria;o__Actinomycetales;f__Actinomycetaceae;g__Actinomyces           | 20  | 0   | 110 | 0  | 16  | 0 |
| k__Bacteria;p__Actinobacteria;c__Actinobacteria;o__Actinomycetales;f__Actinomycetaceae;g__Flaviflexus           | 0   | 0   | 7   | 0  | 0   | 0 |
| k__Bacteria;p__Actinobacteria;c__Actinobacteria;o__Actinomycetales;f__Actinomycetaceae;g__Varibaculum           | 0   | 0   | 3   | 0  | 0   | 0 |
| k__Bacteria;p__Actinobacteria;c__Actinobacteria;o__Bifidobacteriales;f__Bifidobacteriaceae;g__Bifidobacterium   | 14  | 2   | 26  | 11 | 6   | 0 |
| k__Bacteria;p__Actinobacteria;c__Actinobacteria;o__Corynebacteriales;f__Corynebacteriaceae;g__Corynebacterium   | 0   | 0   | 0   | 0  | 48  | 0 |
| k__Bacteria;p__Actinobacteria;c__Actinobacteria;o__Corynebacteriales;f__Corynebacteriaceae;g__Corynebacterium 1 | 109 | 170 | 296 | 27 | 219 | 5 |
| k__Bacteria;p__Actinobacteria;c__Actinobacteria;o__Corynebacteriales;f__Corynebacteriaceae;g__Lawsonella        | 9   | 6   | 24  | 9  | 43  | 0 |
| k__Bacteria;p__Actinobacteria;c__Actinobacteria;o__Corynebacteriales;f__Dietziaceae;g__Dietzia                  | 9   | 0   | 13  | 0  | 120 | 0 |
| k__Bacteria;p__Actinobacteria;c__Actinobacteria;o__Corynebacteriales;f__Mycobacteriaceae;g__Mycobacterium       | 0   | 0   | 0   | 0  | 13  | 0 |
| k__Bacteria;p__Actinobacteria;c__Actinobacteria;o__Corynebacteriales;f__Nocardiaceae;g__Rhodococcus             | 11  | 0   | 0   | 0  | 8   | 7 |
| k__Bacteria;p__Actinobacteria;c__Actinobacteria;o__Frankiales;f__Cryptosporangiaceae;g__Fodinicola              | 0   | 0   | 0   | 0  | 4   | 0 |
| k__Bacteria;p__Actinobacteria;c__Actinobacteria;o__Frankiales;f__Geodermatophilaceae;g__Blastococcus            | 5   | 0   | 0   | 0  | 0   | 0 |
| k__Bacteria;p__Actinobacteria;c__Actinobacteria;o__Frankiales;f__Geodermatophilaceae;g__Geodermatophilus        | 9   | 0   | 0   | 0  | 0   | 0 |
| k__Bacteria;p__Actinobacteria;c__Actinobacteria;o__Frankiales;__;                                               | 0   | 2   | 0   | 0  | 0   | 0 |
| k__Bacteria;p__Actinobacteria;c__Actinobacteria;o__Micrococcales;f__Brevibacteriaceae;g__Brevibacterium         | 16  | 0   | 0   | 6  | 24  | 0 |
| k__Bacteria;p__Actinobacteria;c__Actinobacteria;o__Micrococcales;f__Cellulomonadaceae;g__Actinotalea            | 0   | 0   | 13  | 0  | 15  | 0 |
| k__Bacteria;p__Actinobacteria;c__Actinobacteria;o__Micrococcales;f__Cellulomonadaceae;g__Cellulomonas           | 0   | 0   | 12  | 0  | 0   | 0 |

|                                                                                                                  |     |    |     |    |    |   |
|------------------------------------------------------------------------------------------------------------------|-----|----|-----|----|----|---|
| k__Bacteria;p__Actinobacteria;c__Actinobacteria;o__Micrococcales;f__Dermabacteracea<br>e;g__Brachy bacterium     | 49  | 14 | 23  | 14 | 53 | 0 |
| k__Bacteria;p__Actinobacteria;c__Actinobacteria;o__Micrococcales;f__Dermabacteracea<br>e;g__Dermabacter          | 0   | 0  | 0   | 0  | 4  | 0 |
| k__Bacteria;p__Actinobacteria;c__Actinobacteria;o__Micrococcales;f__Dermatophilacea<br>e;g__Piscicoccus          | 7   | 0  | 5   | 0  | 7  | 0 |
| k__Bacteria;p__Actinobacteria;c__Actinobacteria;o__Micrococcales;f__Intrasporangiacea<br>e;g__AQUIPURIBACTER     | 0   | 0  | 5   | 0  | 0  | 0 |
| k__Bacteria;p__Actinobacteria;c__Actinobacteria;o__Micrococcales;f__Intrasporangiacea<br>e;g__Ornithinimicrobium | 39  | 11 | 13  | 6  | 82 | 0 |
| k__Bacteria;p__Actinobacteria;c__Actinobacteria;o__Micrococcales;f__Intrasporangiacea<br>e;g__                   | 33  | 0  | 0   | 16 | 27 | 0 |
| k__Bacteria;p__Actinobacteria;c__Actinobacteria;o__Micrococcales;f__Microbacteriacea<br>e;g__Microbacterium      | 37  | 20 | 16  | 0  | 25 | 0 |
| k__Bacteria;p__Actinobacteria;c__Actinobacteria;o__Micrococcales;f__Micrococcaceae;<br>g__Garicola               | 0   | 0  | 0   | 0  | 5  | 0 |
| k__Bacteria;p__Actinobacteria;c__Actinobacteria;o__Micrococcales;f__Micrococcaceae;<br>g__Glutamicibacter        | 6   | 0  | 9   | 0  | 0  | 0 |
| k__Bacteria;p__Actinobacteria;c__Actinobacteria;o__Micrococcales;f__Micrococcaceae;<br>g__Kocuria                | 106 | 18 | 36  | 34 | 92 | 0 |
| k__Bacteria;p__Actinobacteria;c__Actinobacteria;o__Micrococcales;f__Micrococcaceae;<br>g__Micrococcus            | 50  | 0  | 143 | 17 | 24 | 0 |
| k__Bacteria;p__Actinobacteria;c__Actinobacteria;o__Micrococcales;f__Micrococcaceae;<br>g__Rothia                 | 13  | 0  | 245 | 0  | 16 | 0 |
| k__Bacteria;p__Actinobacteria;c__Actinobacteria;o__Micrococcales;f__Micrococcaceae;<br>g__                       | 0   | 9  | 0   | 0  | 11 | 0 |
| k__Bacteria;p__Actinobacteria;c__Actinobacteria;o__Micrococcales;f__Ruaniaceae;g__R<br>uania                     | 5   | 0  | 0   | 0  | 0  | 0 |
| k__Bacteria;p__Actinobacteria;c__Actinobacteria;o__Micrococcales;f__                                             | 8   | 4  | 6   | 0  | 12 | 0 |
| k__Bacteria;p__Actinobacteria;c__Actinobacteria;o__Micromonosporales;f__Micromono<br>sporaceae;g__               | 8   | 0  | 0   | 0  | 0  | 0 |
| k__Bacteria;p__Actinobacteria;c__Actinobacteria;o__Propionibacteriales;f__Nocardioida<br>ceae;g__Nocardioides    | 0   | 0  | 6   | 8  | 7  | 0 |

|                                                                                                                                       |     |      |     |     |     |   |
|---------------------------------------------------------------------------------------------------------------------------------------|-----|------|-----|-----|-----|---|
| k__Bacteria;p__Actinobacteria;c__Actinobacteria;o__Propionibacteriales;f__Nocardioideaceae;g__                                        | 17  | 0    | 0   | 0   | 0   | 0 |
| k__Bacteria;p__Actinobacteria;c__Actinobacteria;o__Propionibacteriales;f__Propionibacteriaceae;g__Cutibacterium                       | 118 | 30   | 208 | 38  | 136 | 0 |
| k__Bacteria;p__Actinobacteria;c__Actinobacteria;o__Propionibacteriales;f__Propionibacteriaceae;g__Propioniciclava                     | 0   | 0    | 0   | 0   | 9   | 0 |
| k__Bacteria;p__Actinobacteria;c__Actinobacteria;o__Propionibacteriales;f__Propionibacteriaceae;g__Tessaracoccus                       | 0   | 0    | 0   | 0   | 9   | 0 |
| k__Bacteria;p__Actinobacteria;c__Actinobacteria;o__Pseudonocardiales;f__Pseudonocardiaaceae;g__Saccharomonospora                      | 0   | 0    | 0   | 0   | 3   | 0 |
| k__Bacteria;p__Actinobacteria;c__Actinobacteria;o__Pseudonocardiales;f__Pseudonocardiaaceae;g__Saccharopolyspora                      | 4   | 0    | 0   | 0   | 0   | 0 |
| k__Bacteria;p__Actinobacteria;c__Coriobacteriia;o__Coriobacteriales;f__Atopobiaceae;g__Atopobium                                      | 0   | 0    | 7   | 3   | 0   | 0 |
| k__Bacteria;p__Actinobacteria;c__Coriobacteriia;o__Coriobacteriales;f__Atopobiaceae;g__Coriobacteriaceae UCG-002                      | 32  | 343  | 57  | 161 | 170 | 0 |
| k__Bacteria;p__Actinobacteria;c__Coriobacteriia;o__Coriobacteriales;f__Atopobiaceae;g__Olsenella                                      | 7   | 0    | 0   | 0   | 0   | 0 |
| k__Bacteria;p__Actinobacteria;c__Coriobacteriia;o__Coriobacteriales;f__Coriobacteriales Incertae Sedis;g__uncultured                  | 0   | 11   | 0   | 5   | 13  | 0 |
| k__Bacteria;p__Actinobacteria;c__Coriobacteriia;o__Coriobacteriales;f__Eggerthellaceae;g__DNF00809                                    | 0   | 10   | 15  | 14  | 0   | 0 |
| k__Bacteria;p__Actinobacteria;c__Coriobacteriia;o__Coriobacteriales;f__Eggerthellaceae;g__Enterorhabdus                               | 193 | 1428 | 113 | 442 | 554 | 0 |
| k__Bacteria;p__Actinobacteria;c__Coriobacteriia;o__Coriobacteriales;f__Eggerthellaceae;g__Parvibacter                                 | 0   | 26   | 0   | 0   | 0   | 0 |
| k__Bacteria;p__Actinobacteria;c__Coriobacteriia;o__Coriobacteriales;f__Eggerthellaceae;g__                                            | 13  | 34   | 0   | 14  | 5   | 0 |
| k__Bacteria;p__Actinobacteria;c__Coriobacteriia;o__Coriobacteriales;f__uncultured;g__uncultured bacterium                             | 5   | 151  | 53  | 114 | 93  | 0 |
| k__Bacteria;p__Actinobacteria;c__Nitriliruptoria;o__Nitriliruptorales;f__Nitriliruptoraceae;g__uncultured Nitriliruptorales bacterium | 0   | 0    | 0   | 2   | 0   | 0 |
| k__Bacteria;p__Actinobacteria;c__Thermoleophilia;o__Solirubrobacterales;f__Solirubrobacteraceae;g__Parviterribacter                   | 5   | 0    | 0   | 0   | 0   | 0 |



|                                                                                                                      |      |       |      |       |      |   |
|----------------------------------------------------------------------------------------------------------------------|------|-------|------|-------|------|---|
| k__Bacteria;p__Bacteroidetes;c__Bacteroidia;o__Bacteroidales;f__Bacteroidaceae;g__Bacteroides                        | 4137 | 6281  | 507  | 8192  | 5143 | 0 |
| k__Bacteria;p__Bacteroidetes;c__Bacteroidia;o__Bacteroidales;f__F082;g__uncultured bacterium                         | 0    | 13    | 0    | 13    | 0    | 0 |
| k__Bacteria;p__Bacteroidetes;c__Bacteroidia;o__Bacteroidales;f__Marinifilaceae;g__Butyrimonas                        | 12   | 156   | 9    | 132   | 27   | 0 |
| k__Bacteria;p__Bacteroidetes;c__Bacteroidia;o__Bacteroidales;f__Marinifilaceae;g__Odo ribacter                       | 82   | 904   | 141  | 745   | 307  | 0 |
| k__Bacteria;p__Bacteroidetes;c__Bacteroidia;o__Bacteroidales;f__Muribaculaceae;g__Muribaculum                        | 43   | 168   | 0    | 215   | 90   | 0 |
| k__Bacteria;p__Bacteroidetes;c__Bacteroidia;o__Bacteroidales;f__Muribaculaceae;g__mouse gut metagenome               | 70   | 256   | 123  | 352   | 391  | 0 |
| k__Bacteria;p__Bacteroidetes;c__Bacteroidia;o__Bacteroidales;f__Muribaculaceae;g__uncultured Bacteroidales bacterium | 180  | 3810  | 405  | 748   | 548  | 0 |
| k__Bacteria;p__Bacteroidetes;c__Bacteroidia;o__Bacteroidales;f__Muribaculaceae;g__uncultured Barnesiella sp.         | 0    | 0     | 14   | 38    | 57   | 0 |
| k__Bacteria;p__Bacteroidetes;c__Bacteroidia;o__Bacteroidales;f__Muribaculaceae;g__uncultured bacterium               | 2313 | 15785 | 3579 | 13895 | 9306 | 0 |
| k__Bacteria;p__Bacteroidetes;c__Bacteroidia;o__Bacteroidales;f__Muribaculaceae;g__                                   | 1790 | 4903  | 931  | 4972  | 2790 | 0 |
| k__Bacteria;p__Bacteroidetes;c__Bacteroidia;o__Bacteroidales;f__Paludibacteraceae;g__Paludibacter                    | 0    | 0     | 0    | 0     | 2    | 0 |
| k__Bacteria;p__Bacteroidetes;c__Bacteroidia;o__Bacteroidales;f__Paludibacteraceae;g__uncultured                      | 0    | 0     | 0    | 0     | 2    | 0 |
| k__Bacteria;p__Bacteroidetes;c__Bacteroidia;o__Bacteroidales;f__Porphyromonadaceae;g__Porphyromonas                  | 0    | 0     | 12   | 0     | 10   | 0 |
| k__Bacteria;p__Bacteroidetes;c__Bacteroidia;o__Bacteroidales;f__Prevotellaceae;g__All oprevotella                    | 48   | 1927  | 228  | 172   | 39   | 0 |
| k__Bacteria;p__Bacteroidetes;c__Bacteroidia;o__Bacteroidales;f__Prevotellaceae;g__Paraprevotella                     | 140  | 2025  | 19   | 555   | 516  | 0 |
| k__Bacteria;p__Bacteroidetes;c__Bacteroidia;o__Bacteroidales;f__Prevotellaceae;g__Prevotella                         | 2    | 0     | 21   | 0     | 0    | 0 |
| k__Bacteria;p__Bacteroidetes;c__Bacteroidia;o__Bacteroidales;f__Prevotellaceae;g__Prevotella 1                       | 0    | 0     | 2    | 0     | 0    | 0 |

|                                                                                                              |     |      |     |      |      |    |
|--------------------------------------------------------------------------------------------------------------|-----|------|-----|------|------|----|
| k__Bacteria;p__Bacteroidetes;c__Bacteroidia;o__Bacteroidales;f__Prevotellaceae;g__Prevotella 2               | 0   | 0    | 6   | 0    | 0    | 0  |
| k__Bacteria;p__Bacteroidetes;c__Bacteroidia;o__Bacteroidales;f__Prevotellaceae;g__Prevotella 7               | 6   | 0    | 139 | 0    | 0    | 0  |
| k__Bacteria;p__Bacteroidetes;c__Bacteroidia;o__Bacteroidales;f__Prevotellaceae;g__Prevotella 9               | 0   | 0    | 0   | 0    | 0    | 11 |
| k__Bacteria;p__Bacteroidetes;c__Bacteroidia;o__Bacteroidales;f__Prevotellaceae;g__Prevotellaceae UCG-001     | 370 | 2603 | 110 | 2609 | 1548 | 0  |
| k__Bacteria;p__Bacteroidetes;c__Bacteroidia;o__Bacteroidales;f__Prevotellaceae;g__Prevotellaceae UCG-003     | 29  | 1132 | 0   | 762  | 834  | 0  |
| k__Bacteria;p__Bacteroidetes;c__Bacteroidia;o__Bacteroidales;f__Prolixibacteraceae;g__uncultured             | 0   | 0    | 0   | 0    | 9    | 0  |
| k__Bacteria;p__Bacteroidetes;c__Bacteroidia;o__Bacteroidales;f__Rikenellaceae;g__Alistipes                   | 252 | 2604 | 143 | 1722 | 1022 | 0  |
| k__Bacteria;p__Bacteroidetes;c__Bacteroidia;o__Bacteroidales;f__Rikenellaceae;g__Rikenella                   | 98  | 381  | 30  | 380  | 78   | 0  |
| k__Bacteria;p__Bacteroidetes;c__Bacteroidia;o__Bacteroidales;f__Rikenellaceae;g__Rikenellaceae RC9 gut group | 215 | 1398 | 155 | 1210 | 333  | 0  |
| k__Bacteria;p__Bacteroidetes;c__Bacteroidia;o__Bacteroidales;f__Rikenellaceae;g__                            | 64  | 171  | 18  | 162  | 30   | 0  |
| k__Bacteria;p__Bacteroidetes;c__Bacteroidia;o__Bacteroidales;f__Rs-E47 termite group;g__uncultured bacterium | 7   | 84   | 29  | 428  | 94   | 0  |
| k__Bacteria;p__Bacteroidetes;c__Bacteroidia;o__Bacteroidales;f__Tannerellaceae;g__Parabacteroides            | 161 | 9634 | 278 | 1996 | 1357 | 0  |
| k__Bacteria;p__Bacteroidetes;c__Bacteroidia;o__Bacteroidales;f__                                             | 8   | 0    | 29  | 0    | 0    | 0  |
| k__Bacteria;p__Bacteroidetes;c__Bacteroidia;o__Chitinophagales;f__Chitinophagaceae;g__Asinibacterium         | 14  | 15   | 28  | 24   | 59   | 0  |
| k__Bacteria;p__Bacteroidetes;c__Bacteroidia;o__Chitinophagales;f__Chitinophagaceae;g__Sediminibacterium      | 39  | 25   | 34  | 25   | 46   | 0  |
| k__Bacteria;p__Bacteroidetes;c__Bacteroidia;o__Chitinophagales;f__Chitinophagaceae;g__Segetibacter           | 0   | 0    | 0   | 0    | 2    | 0  |
| k__Bacteria;p__Bacteroidetes;c__Bacteroidia;o__Chitinophagales;f__Chitinophagaceae;g__                       | 0   | 0    | 5   | 0    | 0    | 0  |
| k__Bacteria;p__Bacteroidetes;c__Bacteroidia;o__Chitinophagales;f__Saprospiraceae;g__uncultured               | 0   | 0    | 0   | 0    | 11   | 0  |

|                                                                                                         |     |     |    |    |     |   |
|---------------------------------------------------------------------------------------------------------|-----|-----|----|----|-----|---|
| k__Bacteria;p__Bacteroidetes;c__Bacteroidia;o__Cytophagales;f__Hymenobacteraceae;g__Hymenobacter        | 28  | 0   | 10 | 0  | 0   | 0 |
| k__Bacteria;p__Bacteroidetes;c__Bacteroidia;o__Cytophagales;f__Hymenobacteraceae;g__Pontibacter         | 4   | 0   | 2  | 0  | 0   | 0 |
| k__Bacteria;p__Bacteroidetes;c__Bacteroidia;o__Cytophagales;f__Hymenobacteraceae;g__Rufibacter          | 7   | 0   | 0  | 0  | 0   | 0 |
| k__Bacteria;p__Bacteroidetes;c__Bacteroidia;o__Cytophagales;f__Spirosomaceae;g__Arcicella               | 269 | 62  | 18 | 59 | 277 | 0 |
| k__Bacteria;p__Bacteroidetes;c__Bacteroidia;o__Flavobacteriales;f__Flavobacteriaceae;g__Capnocytophaga  | 0   | 0   | 3  | 0  | 4   | 0 |
| k__Bacteria;p__Bacteroidetes;c__Bacteroidia;o__Flavobacteriales;f__Flavobacteriaceae;g__Flavobacterium  | 0   | 0   | 12 | 0  | 0   | 3 |
| k__Bacteria;p__Bacteroidetes;c__Bacteroidia;o__Flavobacteriales;f__Flavobacteriaceae;g__Gillisia        | 0   | 0   | 8  | 0  | 0   | 0 |
| k__Bacteria;p__Bacteroidetes;c__Bacteroidia;o__Flavobacteriales;f__Flavobacteriaceae;g__Lutibacter      | 0   | 0   | 0  | 0  | 6   | 0 |
| k__Bacteria;p__Bacteroidetes;c__Bacteroidia;o__Flavobacteriales;f__Flavobacteriaceae;g__Myroides        | 2   | 0   | 0  | 0  | 0   | 0 |
| k__Bacteria;p__Bacteroidetes;c__Bacteroidia;o__Flavobacteriales;f__Flavobacteriaceae;g__Salegentibacter | 24  | 0   | 0  | 0  | 6   | 0 |
| k__Bacteria;p__Bacteroidetes;c__Bacteroidia;o__Flavobacteriales;f__Flavobacteriaceae;g__Salinimicrobium | 0   | 3   | 3  | 3  | 9   | 0 |
| k__Bacteria;p__Bacteroidetes;c__Bacteroidia;o__Flavobacteriales;f__Flavobacteriaceae;g__uncultured      | 15  | 144 | 0  | 13 | 9   | 0 |
| k__Bacteria;p__Bacteroidetes;c__Bacteroidia;o__Flavobacteriales;f__Flavobacteriaceae;g__                | 0   | 0   | 0  | 0  | 8   | 0 |
| k__Bacteria;p__Bacteroidetes;c__Bacteroidia;o__Flavobacteriales;f__Weeksellaceae;g__Bergeyella          | 0   | 0   | 0  | 0  | 16  | 0 |
| k__Bacteria;p__Bacteroidetes;c__Bacteroidia;o__Flavobacteriales;f__Weeksellaceae;g__Chishuiella         | 27  | 0   | 5  | 0  | 0   | 0 |
| k__Bacteria;p__Bacteroidetes;c__Bacteroidia;o__Flavobacteriales;f__Weeksellaceae;g__Chryseobacterium    | 16  | 13  | 19 | 8  | 27  | 0 |
| k__Bacteria;p__Bacteroidetes;c__Bacteroidia;o__Flavobacteriales;f__Weeksellaceae;g__Cloacibacterium     | 13  | 0   | 15 | 0  | 3   | 0 |

|                                                                                                                      |    |    |    |    |    |   |
|----------------------------------------------------------------------------------------------------------------------|----|----|----|----|----|---|
| k__Bacteria;p__Bacteroidetes;c__Bacteroidia;o__Flavobacteriales;f__Weeksellaceae;g__Empedobacter                     | 0  | 0  | 12 | 0  | 0  | 0 |
| k__Bacteria;p__Bacteroidetes;c__Bacteroidia;o__Flavobacteriales;f__Weeksellaceae;g__Moheibacter                      | 0  | 5  | 0  | 0  | 0  | 0 |
| k__Bacteria;p__Bacteroidetes;c__Bacteroidia;o__Flavobacteriales;f__Weeksellaceae;g__Ornithobacterium                 | 0  | 0  | 0  | 0  | 14 | 0 |
| k__Bacteria;p__Bacteroidetes;c__Bacteroidia;o__Flavobacteriales;f__Weeksellaceae;g__                                 | 0  | 0  | 0  | 0  | 3  | 0 |
| k__Bacteria;p__Bacteroidetes;c__Bacteroidia;o__Sphingobacteriales;f__CMW-169;g__uncultured bacterium                 | 0  | 0  | 0  | 0  | 0  | 3 |
| k__Bacteria;p__Bacteroidetes;c__Bacteroidia;o__Sphingobacteriales;f__Lentimicrobiaceae;g__uncultured Owenweeksia sp. | 13 | 0  | 0  | 0  | 0  | 0 |
| k__Bacteria;p__Bacteroidetes;c__Bacteroidia;o__Sphingobacteriales;f__Sphingobacteriaceae;g__Mucilaginibacter         | 46 | 7  | 15 | 9  | 29 | 0 |
| k__Bacteria;p__Bacteroidetes;c__Bacteroidia;o__Sphingobacteriales;f__Sphingobacteriaceae;g__Sphingobacterium         | 0  | 0  | 16 | 0  | 0  | 0 |
| k__Bacteria;p__Bacteroidetes;c__Bacteroidia;o__Sphingobacteriales;f__Sphingobacteriaceae;g__uncultured               | 0  | 15 | 0  | 0  | 0  | 0 |
| k__Bacteria;p__Bacteroidetes;c__Bacteroidia;o__Sphingobacteriales;f__env.OPS17;g__Tuber borchii symbiont b-17BO      | 33 | 7  | 28 | 14 | 39 | 0 |
| k__Bacteria;p__Chlamydiae;c__Chlamydiae;o__Chlamydiales;f__Chlamydiaceae;g__Chlamydia                                | 0  | 0  | 0  | 0  | 14 | 0 |
| k__Bacteria;p__Chlamydiae;c__Chlamydiae;o__Chlamydiales;f__Simkaniaceae;g__uncultured                                | 49 | 8  | 21 | 10 | 40 | 0 |
| k__Bacteria;p__Chloroflexi;c__Anaerolineae;o__Caldilineales;f__Caldilineaceae;g__uncultured                          | 0  | 0  | 0  | 0  | 11 | 0 |
| k__Bacteria;p__Chloroflexi;c__Anaerolineae;o__RBG-13-54-9;f__uncultured bacterium;g__uncultured bacterium            | 0  | 0  | 0  | 0  | 3  | 0 |
| k__Bacteria;p__Chloroflexi;c__Anaerolineae;g__                                                                       | 6  | 0  | 0  | 0  | 0  | 0 |
| k__Bacteria;p__Chloroflexi;c__Chloroflexia;o__Chloroflexales;f__Chloroflexaceae;g__Candidatus Chloroploca            | 3  | 0  | 0  | 0  | 0  | 0 |
| k__Bacteria;p__Chloroflexi;c__Chloroflexia;o__Thermomicrobiales;f__JG30-KF-CM45;g__Paraburkholderia tropica          | 0  | 0  | 0  | 0  | 5  | 0 |
| k__Bacteria;p__Chloroflexi;c__Chloroflexia;o__Thermomicrobiales;f__JG30-KF-CM45;g__uncultured bacterium              | 0  | 0  | 0  | 7  | 11 | 0 |

|                                                                                                                                             |      |     |      |     |     |   |
|---------------------------------------------------------------------------------------------------------------------------------------------|------|-----|------|-----|-----|---|
| k__Bacteria;p__Chloroflexi;c__Chloroflexia;o__Thermomicrobiales;f__JG30-KF-CM45;__                                                          | 0    | 0   | 0    | 0   | 8   | 0 |
| k__Bacteria;p__Chloroflexi;c__Gitt-GS-136;o__uncultured bacterium;f__uncultured bacterium;g__uncultured bacterium                           | 7    | 0   | 0    | 0   | 0   | 0 |
| k__Bacteria;p__Chloroflexi;c__Gitt-GS-136;__;__;__                                                                                          | 0    | 3   | 5    | 0   | 0   | 0 |
| k__Bacteria;p__Coprothermobacteraeota;c__Coprothermobacteria;o__Coprothermobacterales;f__Coprothermobacteraceae;g__Coprothermobacter        | 0    | 0   | 4    | 0   | 5   | 0 |
| k__Bacteria;p__Cyanobacteria;c__Melainabacteria;o__Gastranaerophilales;f__uncultured bacterium;g__uncultured bacterium                      | 0    | 19  | 0    | 15  | 55  | 0 |
| k__Bacteria;p__Cyanobacteria;c__Melainabacteria;o__Gastranaerophilales;f__uncultured rumen bacterium;g__uncultured rumen bacterium          | 9    | 20  | 0    | 0   | 0   | 0 |
| k__Bacteria;p__Cyanobacteria;c__Melainabacteria;o__Gastranaerophilales;__;__;__                                                             | 28   | 17  | 2    | 14  | 35  | 0 |
| k__Bacteria;p__Cyanobacteria;c__Melainabacteria;o__Obscuribacterales;f__uncultured bacterium;g__uncultured bacterium                        | 29   | 9   | 38   | 3   | 57  | 0 |
| k__Bacteria;p__Cyanobacteria;c__Melainabacteria;o__Obscuribacterales;__;__;__                                                               | 141  | 33  | 28   | 36  | 180 | 0 |
| k__Bacteria;p__Cyanobacteria;c__Oxyphotobacteria;o__Chloroplast;f__Aegyptius monachus (black vulture);g__Aegyptius monachus (black vulture) | 0    | 0   | 20   | 0   | 0   | 0 |
| k__Bacteria;p__Cyanobacteria;c__Oxyphotobacteria;o__Chloroplast;f__Poterioochromonas sp. DS;g__Poterioochromonas sp. DS                     | 1118 | 273 | 1325 | 303 | 518 | 0 |
| k__Bacteria;p__Cyanobacteria;c__Oxyphotobacteria;o__Chloroplast;__;__;__                                                                    | 793  | 164 | 260  | 121 | 796 | 4 |
| k__Bacteria;p__Dadabacteria;c__Dadabacteriia;o__Dadabacteriales;f__uncultured candidate division SBR1093 bacterium;g__uncultured            | 13   | 0   | 7    | 0   | 14  | 0 |
| k__Bacteria;p__Deferribacteres;c__Deferribacteres;o__Deferribacterales;f__Deferribacteraceae;g__Mucispirillum                               | 0    | 38  | 0    | 52  | 13  | 0 |
| k__Bacteria;p__Deinococcus-Thermus;c__Deinococci;o__Deinococcales;f__Deinococcaceae;g__Deinococcus                                          | 0    | 0   | 6    | 0   | 0   | 0 |
| k__Bacteria;p__Deinococcus-Thermus;c__Deinococci;o__Deinococcales;f__Trueperaceae;g__Truepera                                               | 0    | 0   | 0    | 0   | 4   | 0 |
| k__Bacteria;p__Deinococcus-Thermus;c__Deinococci;o__Thermales;f__Thermaceae;g__Meiothermus                                                  | 14   | 3   | 0    | 0   | 5   | 0 |
| k__Bacteria;p__Epsilonbacteraeota;c__Campylobacteria;o__Campylobacteriales;f__Arcobacteraceae;g__Arcobacter                                 | 0    | 0   | 5    | 0   | 0   | 0 |

|                                                                                                                  |    |     |       |       |      |   |
|------------------------------------------------------------------------------------------------------------------|----|-----|-------|-------|------|---|
| k__Bacteria;p__Epsilonbacteraeota;c__Campylobacteria;o__Campylobacterales;f__Campylobacteraceae;g__Campylobacter | 0  | 0   | 7     | 0     | 0    | 0 |
| k__Bacteria;p__Epsilonbacteraeota;c__Campylobacteria;o__Campylobacterales;f__Helicobacteraceae;g__Helicobacter   | 0  | 168 | 4     | 577   | 43   | 0 |
| k__Bacteria;p__Firmicutes;c__Bacilli;o__Bacillales;f__Alicyclobacillaceae;g__Tumebacillus                        | 0  | 5   | 0     | 0     | 0    | 0 |
| k__Bacteria;p__Firmicutes;c__Bacilli;o__Bacillales;f__Bacillaceae;g__Aeribacillus                                | 8  | 0   | 0     | 0     | 0    | 0 |
| k__Bacteria;p__Firmicutes;c__Bacilli;o__Bacillales;f__Bacillaceae;g__Anaerobacillus                              | 0  | 0   | 0     | 0     | 0    | 0 |
| k__Bacteria;p__Firmicutes;c__Bacilli;o__Bacillales;f__Bacillaceae;g__Bacillus                                    | 58 | 9   | 51299 | 25    | 58   | 0 |
| k__Bacteria;p__Firmicutes;c__Bacilli;o__Bacillales;f__Bacillaceae;g__Hydrogenibacillus                           | 0  | 0   | 0     | 0     | 0    | 0 |
| k__Bacteria;p__Firmicutes;c__Bacilli;o__Bacillales;f__Bacillaceae;g__Oceanobacillus                              | 0  | 13  | 9     | 4     | 0    | 0 |
| k__Bacteria;p__Firmicutes;c__Bacilli;o__Bacillales;f__Bacillaceae;g__Pseudogracilibacillus                       | 15 | 0   | 0     | 0     | 0    | 0 |
| k__Bacteria;p__Firmicutes;c__Bacilli;o__Bacillales;f__Bacillaceae;g__Ureibacillus                                | 3  | 0   | 0     | 0     | 0    | 0 |
| k__Bacteria;p__Firmicutes;c__Bacilli;o__Bacillales;f__Bacillaceae;g__Virgibacillus                               | 0  | 16  | 9     | 5     | 3    | 0 |
| k__Bacteria;p__Firmicutes;c__Bacilli;o__Bacillales;f__Bacillaceae;g__uncultured                                  | 0  | 0   | 0     | 0     | 6    | 0 |
| k__Bacteria;p__Firmicutes;c__Bacilli;o__Bacillales;f__Bacillaceae;g__                                            | 0  | 0   | 0     | 1     | 7    | 0 |
| k__Bacteria;p__Firmicutes;c__Bacilli;o__Bacillales;f__Family XI;g__Gemella                                       | 16 | 0   | 114   | 12    | 13   | 0 |
| k__Bacteria;p__Firmicutes;c__Bacilli;o__Bacillales;f__Family XII;g__Exiguobacterium                              | 18 | 0   | 13    | 4     | 17   | 0 |
| k__Bacteria;p__Firmicutes;c__Bacilli;o__Bacillales;f__Paenibacillaceae;g__Paenibacillus                          | 0  | 0   | 1173  | 12255 | 3    | 0 |
| k__Bacteria;p__Firmicutes;c__Bacilli;o__Bacillales;f__Planococcaceae;g__Chryseomicrobium                         | 9  | 0   | 9     | 0     | 0    | 0 |
| k__Bacteria;p__Firmicutes;c__Bacilli;o__Bacillales;f__Planococcaceae;g__Domibacillus                             | 6  | 0   | 0     | 0     | 0    | 0 |
| k__Bacteria;p__Firmicutes;c__Bacilli;o__Bacillales;f__Planococcaceae;g__Kurthia                                  | 19 | 12  | 8     | 14    | 35   | 0 |
| k__Bacteria;p__Firmicutes;c__Bacilli;o__Bacillales;f__Planococcaceae;g__Lysinibacillus                           | 9  | 3   | 4     | 0     | 0    | 9 |
| k__Bacteria;p__Firmicutes;c__Bacilli;o__Bacillales;f__Planococcaceae;g__Planococcus                              | 0  | 0   | 16    | 0     | 1700 | 0 |
| k__Bacteria;p__Firmicutes;c__Bacilli;o__Bacillales;f__Planococcaceae;g__Planomicrobium                           | 0  | 0   | 0     | 0     | 33   | 0 |
| k__Bacteria;p__Firmicutes;c__Bacilli;o__Bacillales;f__Planococcaceae;g__                                         | 9  | 0   | 32    | 18    | 1178 | 0 |

|                                                                                                 |     |      |     |    |     |   |
|-------------------------------------------------------------------------------------------------|-----|------|-----|----|-----|---|
| k__Bacteria;p__Firmicutes;c__Bacilli;o__Bacillales;f__Staphylococcaceae;g__Aliicoccus           | 0   | 0    | 0   | 0  | 27  | 0 |
| k__Bacteria;p__Firmicutes;c__Bacilli;o__Bacillales;f__Staphylococcaceae;g__Jeotgalicoccus       | 20  | 101  | 11  | 5  | 14  | 0 |
| k__Bacteria;p__Firmicutes;c__Bacilli;o__Bacillales;f__Staphylococcaceae;g__S31                  | 6   | 0    | 0   | 0  | 26  | 0 |
| k__Bacteria;p__Firmicutes;c__Bacilli;o__Bacillales;f__Staphylococcaceae;g__Salinicoccus         | 62  | 8    | 14  | 10 | 131 | 0 |
| k__Bacteria;p__Firmicutes;c__Bacilli;o__Bacillales;f__Staphylococcaceae;g__Staphylococcus       | 252 | 835  | 611 | 34 | 206 | 0 |
| k__Bacteria;p__Firmicutes;c__Bacilli;o__Bacillales;f__Thermoactinomycetaceae;g__Novibacillus    | 0   | 0    | 0   | 2  | 0   | 0 |
| k__Bacteria;p__Firmicutes;c__Bacilli;o__Bacillales;f__Thermoactinomycetaceae;g__uncultured      | 0   | 0    | 5   | 0  | 0   | 0 |
| k__Bacteria;p__Firmicutes;c__Bacilli;o__Lactobacillales;f__Aerococcaceae;g__Abiotrophia         | 0   | 0    | 0   | 0  | 2   | 0 |
| k__Bacteria;p__Firmicutes;c__Bacilli;o__Lactobacillales;f__Aerococcaceae;g__Aerococcus          | 0   | 699  | 27  | 16 | 38  | 0 |
| k__Bacteria;p__Firmicutes;c__Bacilli;o__Lactobacillales;f__Aerococcaceae;g__Eremococcus         | 9   | 0    | 10  | 0  | 0   | 0 |
| k__Bacteria;p__Firmicutes;c__Bacilli;o__Lactobacillales;f__Aerococcaceae;g__Facklami            | 7   | 1832 | 55  | 0  | 22  | 0 |
| k__Bacteria;p__Firmicutes;c__Bacilli;o__Lactobacillales;f__Aerococcaceae;g__Ignavigranum        | 6   | 44   | 2   | 0  | 0   | 0 |
| k__Bacteria;p__Firmicutes;c__Bacilli;o__Lactobacillales;f__Carnobacteriaceae;g__Alkalibacterium | 34  | 12   | 16  | 6  | 71  | 0 |
| k__Bacteria;p__Firmicutes;c__Bacilli;o__Lactobacillales;f__Carnobacteriaceae;g__Atopococcus     | 0   | 0    | 0   | 0  | 8   | 0 |
| k__Bacteria;p__Firmicutes;c__Bacilli;o__Lactobacillales;f__Carnobacteriaceae;g__Atopostipes     | 2   | 30   | 3   | 0  | 9   | 0 |
| k__Bacteria;p__Firmicutes;c__Bacilli;o__Lactobacillales;f__Carnobacteriaceae;g__Desemzia        | 20  | 0    | 0   | 0  | 656 | 0 |
| k__Bacteria;p__Firmicutes;c__Bacilli;o__Lactobacillales;f__Carnobacteriaceae;g__Dolosigranulum  | 0   | 0    | 0   | 0  | 6   | 0 |
| k__Bacteria;p__Firmicutes;c__Bacilli;o__Lactobacillales;f__Carnobacteriaceae;g__Granulicatella  | 5   | 0    | 84  | 0  | 6   | 0 |

|                                                                                                                  |      |      |      |      |      |    |
|------------------------------------------------------------------------------------------------------------------|------|------|------|------|------|----|
| k__Bacteria;p__Firmicutes;c__Bacilli;o__Lactobacillales;f__Carnobacteriaceae;g__Marinilactibacillus              | 6    | 0    | 0    | 0    | 0    | 0  |
| k__Bacteria;p__Firmicutes;c__Bacilli;o__Lactobacillales;f__Carnobacteriaceae;g__Trichococcus                     | 0    | 0    | 10   | 0    | 0    | 0  |
| k__Bacteria;p__Firmicutes;c__Bacilli;o__Lactobacillales;f__Enterococcaceae;g__Enterococcus                       | 8    | 20   | 0    | 23   | 9    | 0  |
| k__Bacteria;p__Firmicutes;c__Bacilli;o__Lactobacillales;f__Lactobacillaceae;g__Lactobacillus                     | 5171 | 5985 | 568  | 7527 | 2482 | 13 |
| k__Bacteria;p__Firmicutes;c__Bacilli;o__Lactobacillales;f__Lactobacillaceae;g__Pediococcus                       | 8    | 0    | 3    | 3    | 0    | 0  |
| k__Bacteria;p__Firmicutes;c__Bacilli;o__Lactobacillales;f__Leuconostocaceae;g__Leuconostoc                       | 6    | 3    | 10   | 5    | 10   | 0  |
| k__Bacteria;p__Firmicutes;c__Bacilli;o__Lactobacillales;f__Leuconostocaceae;g__Weissella                         | 7    | 2    | 8    | 0    | 0    | 0  |
| k__Bacteria;p__Firmicutes;c__Bacilli;o__Lactobacillales;f__Streptococcaceae;g__Lactococcus                       | 87   | 1517 | 94   | 683  | 583  | 0  |
| k__Bacteria;p__Firmicutes;c__Bacilli;o__Lactobacillales;f__Streptococcaceae;g__Streptococcus                     | 249  | 435  | 1757 | 126  | 217  | 0  |
| k__Bacteria;p__Firmicutes;c__Bacilli;o__Lactobacillales;__;__                                                    | 12   | 0    | 32   | 0    | 0    | 0  |
| k__Bacteria;p__Firmicutes;c__Clostridia;o__Clostridiales;f__Christensenellaceae;g__Catabacter                    | 5    | 0    | 0    | 0    | 0    | 0  |
| k__Bacteria;p__Firmicutes;c__Clostridia;o__Clostridiales;f__Christensenellaceae;g__Christensenellaceae R-7 group | 9    | 0    | 4    | 3    | 6    | 0  |
| k__Bacteria;p__Firmicutes;c__Clostridia;o__Clostridiales;f__Christensenellaceae;g__uncultured                    | 6    | 3    | 0    | 0    | 0    | 0  |
| k__Bacteria;p__Firmicutes;c__Clostridia;o__Clostridiales;f__Clostridiaceae 1;g__Candidatus Arthromitus           | 0    | 5    | 0    | 2    | 0    | 0  |
| k__Bacteria;p__Firmicutes;c__Clostridia;o__Clostridiales;f__Clostridiaceae 1;g__Clostridium sensu stricto 1      | 55   | 54   | 276  | 274  | 32   | 0  |
| k__Bacteria;p__Firmicutes;c__Clostridia;o__Clostridiales;f__Clostridiaceae 1;g__Clostridium sensu stricto 12     | 0    | 0    | 0    | 0    | 0    | 0  |
| k__Bacteria;p__Firmicutes;c__Clostridia;o__Clostridiales;f__Clostridiaceae 1;g__Proteiniclasticum                | 0    | 0    | 0    | 0    | 5    | 0  |



|                                                                                                                                    |    |     |    |     |    |   |
|------------------------------------------------------------------------------------------------------------------------------------|----|-----|----|-----|----|---|
| k__Bacteria;p__Firmicutes;c__Clostridia;o__Clostridiales;f__Clostridiaceae<br>4;g__Caminicella                                     | 0  | 0   | 6  | 0   | 0  | 0 |
| k__Bacteria;p__Firmicutes;c__Clostridia;o__Clostridiales;f__Clostridiales vadinBB60<br>group;g__uncultured Clostridia bacterium    | 0  | 24  | 0  | 0   | 0  | 0 |
| k__Bacteria;p__Firmicutes;c__Clostridia;o__Clostridiales;f__Clostridiales vadinBB60<br>group;g__uncultured Clostridiales bacterium | 0  | 56  | 0  | 22  | 9  | 0 |
| k__Bacteria;p__Firmicutes;c__Clostridia;o__Clostridiales;f__Clostridiales vadinBB60<br>group;g__uncultured bacterium               | 18 | 306 | 26 | 102 | 78 | 0 |
| k__Bacteria;p__Firmicutes;c__Clostridia;o__Clostridiales;f__Clostridiales vadinBB60<br>group;g__                                   | 3  | 20  | 5  | 29  | 11 | 0 |
| k__Bacteria;p__Firmicutes;c__Clostridia;o__Clostridiales;f__Defluviitaleaceae;g__Defluv<br>italeaceae UCG-011                      | 0  | 15  | 0  | 0   | 5  | 0 |
| k__Bacteria;p__Firmicutes;c__Clostridia;o__Clostridiales;f__Family XI;g__Anaerococcus                                              | 2  | 3   | 32 | 0   | 4  | 0 |
| k__Bacteria;p__Firmicutes;c__Clostridia;o__Clostridiales;f__Family XI;g__Ezakiella                                                 | 0  | 0   | 10 | 0   | 0  | 0 |
| k__Bacteria;p__Firmicutes;c__Clostridia;o__Clostridiales;f__Family XI;g__Finegoldia                                                | 0  | 0   | 8  | 0   | 0  | 0 |
| k__Bacteria;p__Firmicutes;c__Clostridia;o__Clostridiales;f__Family XI;g__Peptoniphilus                                             | 0  | 0   | 2  | 0   | 0  | 0 |
| k__Bacteria;p__Firmicutes;c__Clostridia;o__Clostridiales;f__Family<br>XI;g__Tepidimicrobium                                        | 7  | 0   | 0  | 0   | 0  | 0 |
| k__Bacteria;p__Firmicutes;c__Clostridia;o__Clostridiales;f__Family XIII;g__Family XIII<br>AD3011 group                             | 3  | 3   | 0  | 6   | 5  | 0 |
| k__Bacteria;p__Firmicutes;c__Clostridia;o__Clostridiales;f__Family<br>XIII;g__[Eubacterium] brachy group                           | 0  | 0   | 13 | 7   | 9  | 0 |
| k__Bacteria;p__Firmicutes;c__Clostridia;o__Clostridiales;f__Family XIII;g__                                                        | 0  | 0   | 0  | 0   | 16 | 0 |
| k__Bacteria;p__Firmicutes;c__Clostridia;o__Clostridiales;f__Lachnospiraceae;g__Butyriv<br>ibrio 2                                  | 5  | 0   | 0  | 2   | 0  | 0 |
| k__Bacteria;p__Firmicutes;c__Clostridia;o__Clostridiales;f__Lachnospiraceae;g__Coproc<br>occus 1                                   | 0  | 0   | 3  | 0   | 0  | 0 |
| k__Bacteria;p__Firmicutes;c__Clostridia;o__Clostridiales;f__Lachnospiraceae;g__Dorea                                               | 8  | 0   | 0  | 0   | 0  | 0 |
| k__Bacteria;p__Firmicutes;c__Clostridia;o__Clostridiales;f__Lachnospiraceae;g__Epulop<br>iscium                                    | 3  | 0   | 0  | 0   | 0  | 0 |
| k__Bacteria;p__Firmicutes;c__Clostridia;o__Clostridiales;f__Lachnospiraceae;g__Hungat<br>ella                                      | 0  | 14  | 0  | 0   | 22 | 0 |

|                                                                                                                  |     |     |     |     |     |   |
|------------------------------------------------------------------------------------------------------------------|-----|-----|-----|-----|-----|---|
| k__Bacteria;p__Firmicutes;c__Clostridia;o__Clostridiales;f__Lachnospiraceae;g__Lachno anaerobaculum              | 0   | 0   | 3   | 0   | 0   | 0 |
| k__Bacteria;p__Firmicutes;c__Clostridia;o__Clostridiales;f__Lachnospiraceae;g__Lachno clostridium                | 0   | 5   | 0   | 5   | 0   | 0 |
| k__Bacteria;p__Firmicutes;c__Clostridia;o__Clostridiales;f__Lachnospiraceae;g__Lachno spiraceae NK4A136 group    | 91  | 436 | 107 | 437 | 149 | 0 |
| k__Bacteria;p__Firmicutes;c__Clostridia;o__Clostridiales;f__Lachnospiraceae;g__Lachno spiraceae XPB1014 group    | 0   | 0   | 6   | 0   | 0   | 0 |
| k__Bacteria;p__Firmicutes;c__Clostridia;o__Clostridiales;f__Lachnospiraceae;g__Tyzzeria                          | 0   | 0   | 0   | 22  | 0   | 0 |
| k__Bacteria;p__Firmicutes;c__Clostridia;o__Clostridiales;f__Lachnospiraceae;g__[Bacteroides] pectinophilus group | 0   | 4   | 0   | 0   | 0   | 0 |
| k__Bacteria;p__Firmicutes;c__Clostridia;o__Clostridiales;f__Lachnospiraceae;g__[Eubacterium] hallii group        | 0   | 0   | 0   | 0   | 4   | 0 |
| k__Bacteria;p__Firmicutes;c__Clostridia;o__Clostridiales;f__Lachnospiraceae;g__[Eubacterium] ruminantium group   | 0   | 0   | 6   | 0   | 0   | 0 |
| k__Bacteria;p__Firmicutes;c__Clostridia;o__Clostridiales;f__Lachnospiraceae;g__[Eubacterium] xylanophilum group  | 16  | 65  | 8   | 54  | 51  | 0 |
| k__Bacteria;p__Firmicutes;c__Clostridia;o__Clostridiales;f__Lachnospiraceae;g__[Ruminococcus] torques group      | 7   | 94  | 4   | 8   | 258 | 0 |
| k__Bacteria;p__Firmicutes;c__Clostridia;o__Clostridiales;f__Lachnospiraceae;g__                                  | 117 | 527 | 32  | 258 | 395 | 0 |
| k__Bacteria;p__Firmicutes;c__Clostridia;o__Clostridiales;f__Peptococcaceae;g__uncultured                         | 2   | 84  | 16  | 71  | 24  | 0 |
| k__Bacteria;p__Firmicutes;c__Clostridia;o__Clostridiales;f__Peptostreptococcaceae;g__Paeniclostridium            | 6   | 0   | 0   | 0   | 0   | 0 |
| k__Bacteria;p__Firmicutes;c__Clostridia;o__Clostridiales;f__Peptostreptococcaceae;g__Peptoclostridium            | 6   | 2   | 0   | 0   | 16  | 0 |
| k__Bacteria;p__Firmicutes;c__Clostridia;o__Clostridiales;f__Peptostreptococcaceae;g__Peptostreptococcus          | 3   | 0   | 4   | 0   | 0   | 0 |
| k__Bacteria;p__Firmicutes;c__Clostridia;o__Clostridiales;f__Peptostreptococcaceae;g__P roteocatella              | 0   | 0   | 0   | 0   | 0   | 0 |
| k__Bacteria;p__Firmicutes;c__Clostridia;o__Clostridiales;f__Peptostreptococcaceae;g__R omboutsia                 | 7   | 207 | 61  | 68  | 271 | 0 |

|                                                                                                              |    |     |    |    |    |   |
|--------------------------------------------------------------------------------------------------------------|----|-----|----|----|----|---|
| k__Bacteria;p__Firmicutes;c__Clostridia;o__Clostridiales;f__Ruminococcaceae;g__Anaerotruncus                 | 0  | 0   | 0  | 0  | 3  | 0 |
| k__Bacteria;p__Firmicutes;c__Clostridia;o__Clostridiales;f__Ruminococcaceae;g__Butyrivicoccus                | 6  | 0   | 0  | 0  | 8  | 0 |
| k__Bacteria;p__Firmicutes;c__Clostridia;o__Clostridiales;f__Ruminococcaceae;g__Candidatus Soleaferrea        | 4  | 0   | 0  | 4  | 6  | 0 |
| k__Bacteria;p__Firmicutes;c__Clostridia;o__Clostridiales;f__Ruminococcaceae;g__Faecalibacterium              | 0  | 0   | 10 | 0  | 8  | 0 |
| k__Bacteria;p__Firmicutes;c__Clostridia;o__Clostridiales;f__Ruminococcaceae;g__Fournierella                  | 6  | 0   | 0  | 0  | 0  | 0 |
| k__Bacteria;p__Firmicutes;c__Clostridia;o__Clostridiales;f__Ruminococcaceae;g__GCA-900066225                 | 0  | 5   | 3  | 0  | 0  | 0 |
| k__Bacteria;p__Firmicutes;c__Clostridia;o__Clostridiales;f__Ruminococcaceae;g__Intestinimonas                | 0  | 75  | 0  | 0  | 0  | 0 |
| k__Bacteria;p__Firmicutes;c__Clostridia;o__Clostridiales;f__Ruminococcaceae;g__Oscillibacter                 | 32 | 99  | 9  | 36 | 18 | 7 |
| k__Bacteria;p__Firmicutes;c__Clostridia;o__Clostridiales;f__Ruminococcaceae;g__Papillibacter                 | 0  | 11  | 5  | 34 | 18 | 0 |
| k__Bacteria;p__Firmicutes;c__Clostridia;o__Clostridiales;f__Ruminococcaceae;g__Ruminiclostridium             | 0  | 15  | 0  | 0  | 18 | 0 |
| k__Bacteria;p__Firmicutes;c__Clostridia;o__Clostridiales;f__Ruminococcaceae;g__Ruminiclostridium 1           | 0  | 33  | 0  | 0  | 0  | 0 |
| k__Bacteria;p__Firmicutes;c__Clostridia;o__Clostridiales;f__Ruminococcaceae;g__Ruminiclostridium 5           | 18 | 304 | 6  | 76 | 34 | 0 |
| k__Bacteria;p__Firmicutes;c__Clostridia;o__Clostridiales;f__Ruminococcaceae;g__Ruminiclostridium 6           | 0  | 55  | 3  | 5  | 9  | 0 |
| k__Bacteria;p__Firmicutes;c__Clostridia;o__Clostridiales;f__Ruminococcaceae;g__Ruminiclostridium 9           | 15 | 185 | 0  | 96 | 16 | 0 |
| k__Bacteria;p__Firmicutes;c__Clostridia;o__Clostridiales;f__Ruminococcaceae;g__Ruminococcaceae NK4A214 group | 6  | 22  | 3  | 17 | 25 | 0 |
| k__Bacteria;p__Firmicutes;c__Clostridia;o__Clostridiales;f__Ruminococcaceae;g__Ruminococcaceae UCG-002       | 5  | 0   | 0  | 0  | 0  | 0 |
| k__Bacteria;p__Firmicutes;c__Clostridia;o__Clostridiales;f__Ruminococcaceae;g__Ruminococcaceae UCG-004       | 11 | 19  | 88 | 6  | 0  | 0 |

|                                                                                                                           |     |      |     |      |      |   |
|---------------------------------------------------------------------------------------------------------------------------|-----|------|-----|------|------|---|
| k__Bacteria;p__Firmicutes;c__Clostridia;o__Clostridiales;f__Ruminococcaceae;g__Ruminococcaceae UCG-005                    | 7   | 19   | 2   | 0    | 10   | 0 |
| k__Bacteria;p__Firmicutes;c__Clostridia;o__Clostridiales;f__Ruminococcaceae;g__Ruminococcaceae UCG-007                    | 0   | 0    | 0   | 15   | 0    | 0 |
| k__Bacteria;p__Firmicutes;c__Clostridia;o__Clostridiales;f__Ruminococcaceae;g__Ruminococcaceae UCG-009                    | 0   | 18   | 3   | 11   | 0    | 0 |
| k__Bacteria;p__Firmicutes;c__Clostridia;o__Clostridiales;f__Ruminococcaceae;g__Ruminococcaceae UCG-010                    | 32  | 286  | 42  | 112  | 136  | 0 |
| k__Bacteria;p__Firmicutes;c__Clostridia;o__Clostridiales;f__Ruminococcaceae;g__Ruminococcaceae UCG-013                    | 56  | 193  | 27  | 179  | 85   | 0 |
| k__Bacteria;p__Firmicutes;c__Clostridia;o__Clostridiales;f__Ruminococcaceae;g__Ruminococcaceae UCG-014                    | 308 | 2555 | 557 | 1361 | 2029 | 0 |
| k__Bacteria;p__Firmicutes;c__Clostridia;o__Clostridiales;f__Ruminococcaceae;g__Ruminococcus 1                             | 6   | 114  | 9   | 75   | 51   | 0 |
| k__Bacteria;p__Firmicutes;c__Clostridia;o__Clostridiales;f__Ruminococcaceae;g__Ruminococcus 2                             | 0   | 0    | 0   | 0    | 7    | 4 |
| k__Bacteria;p__Firmicutes;c__Clostridia;o__Clostridiales;f__Ruminococcaceae;g__[Eubacterium] coprostanoligenes group      | 29  | 246  | 51  | 80   | 217  | 0 |
| k__Bacteria;p__Firmicutes;c__Clostridia;o__Clostridiales;f__Ruminococcaceae;g__uncultured                                 | 39  | 607  | 2   | 156  | 44   | 0 |
| k__Bacteria;p__Firmicutes;c__Clostridia;o__Clostridiales;f__Ruminococcaceae;g__                                           | 413 | 1102 | 156 | 812  | 863  | 0 |
| k__Bacteria;p__Firmicutes;c__Clostridia;o__DTU014;f__uncultured bacterium;g__uncultured bacterium                         | 0   | 0    | 0   | 0    | 11   | 0 |
| k__Bacteria;p__Firmicutes;c__Erysipelotrichia;o__Erysipelotrichales;f__Erysipelotrichaceae;g__Candidatus Stoquefichus     | 11  | 0    | 0   | 21   | 50   | 0 |
| k__Bacteria;p__Firmicutes;c__Erysipelotrichia;o__Erysipelotrichales;f__Erysipelotrichaceae;g__Dubosiella                  | 0   | 0    | 414 | 165  | 0    | 0 |
| k__Bacteria;p__Firmicutes;c__Erysipelotrichia;o__Erysipelotrichales;f__Erysipelotrichaceae;g__Erysipelatoclostridium      | 13  | 74   | 0   | 45   | 49   | 0 |
| k__Bacteria;p__Firmicutes;c__Erysipelotrichia;o__Erysipelotrichales;f__Erysipelotrichaceae;g__Erysipelotrichaceae UCG-002 | 0   | 0    | 4   | 0    | 0    | 0 |
| k__Bacteria;p__Firmicutes;c__Erysipelotrichia;o__Erysipelotrichales;f__Erysipelotrichaceae;g__Faecalibaculum              | 0   | 6    | 0   | 0    | 4    | 0 |

|                                                                                                                            |     |     |     |      |      |   |
|----------------------------------------------------------------------------------------------------------------------------|-----|-----|-----|------|------|---|
| k__Bacteria;p__Firmicutes;c__Erysipelotrichia;o__Erysipelotrichales;f__Erysipelotrichaceae;g__Faecalitalea                 | 0   | 0   | 0   | 0    | 6    | 0 |
| k__Bacteria;p__Firmicutes;c__Erysipelotrichia;o__Erysipelotrichales;f__Erysipelotrichaceae;g__Solobacterium                | 0   | 0   | 9   | 0    | 0    | 0 |
| k__Bacteria;p__Firmicutes;c__Erysipelotrichia;o__Erysipelotrichales;f__Erysipelotrichaceae;g__Turicibacter                 | 0   | 681 | 465 | 1094 | 1841 | 0 |
| k__Bacteria;p__Firmicutes;c__Erysipelotrichia;o__Erysipelotrichales;f__Erysipelotrichaceae;g__[Clostridium] innocuum group | 0   | 2   | 0   | 0    | 0    | 0 |
| k__Bacteria;p__Firmicutes;c__Erysipelotrichia;o__Erysipelotrichales;f__Erysipelotrichaceae;g__uncultured                   | 24  | 31  | 4   | 27   | 55   | 0 |
| k__Bacteria;p__Firmicutes;c__Erysipelotrichia;o__Erysipelotrichales;f__Erysipelotrichaceae;g__                             | 47  | 76  | 0   | 412  | 252  | 0 |
| k__Bacteria;p__Firmicutes;c__Negativicutes;o__Selenomonadales;f__Veillonellaceae;g__Dialister                              | 0   | 0   | 13  | 0    | 0    | 0 |
| k__Bacteria;p__Firmicutes;c__Negativicutes;o__Selenomonadales;f__Veillonellaceae;g__Megasphaera                            | 3   | 0   | 21  | 0    | 0    | 0 |
| k__Bacteria;p__Firmicutes;c__Negativicutes;o__Selenomonadales;f__Veillonellaceae;g__Quinella                               | 262 | 330 | 9   | 488  | 96   | 0 |
| k__Bacteria;p__Firmicutes;c__Negativicutes;o__Selenomonadales;f__Veillonellaceae;g__Selenomonas 3                          | 0   | 0   | 7   | 0    | 0    | 0 |
| k__Bacteria;p__Firmicutes;c__Negativicutes;o__Selenomonadales;f__Veillonellaceae;g__Selenomonas 4                          | 0   | 0   | 4   | 0    | 0    | 0 |
| k__Bacteria;p__Firmicutes;c__Negativicutes;o__Selenomonadales;f__Veillonellaceae;g__Veillonella                            | 50  | 50  | 699 | 64   | 46   | 0 |
| k__Bacteria;p__Firmicutes;c__Negativicutes;o__Selenomonadales;f__Veillonellaceae;g__uncultured                             | 0   | 0   | 7   | 0    | 0    | 0 |
| k__Bacteria;p__Fusobacteria;c__Fusobacteriia;o__Fusobacteriales;f__Fusobacteriaceae;g__Fusobacterium                       | 5   | 0   | 0   | 9    | 0    | 7 |
| k__Bacteria;p__Fusobacteria;c__Fusobacteriia;o__Fusobacteriales;f__Leptotrichiaceae;g__Leptotrichia                        | 0   | 0   | 41  | 0    | 11   | 0 |
| k__Bacteria;p__Fusobacteria;c__Fusobacteriia;o__Fusobacteriales;f__Leptotrichiaceae;g__Streptobacillus                     | 7   | 0   | 0   | 0    | 0    | 0 |
| k__Bacteria;p__Gemmatimonadetes;c__Gemmatimonadetes;o__Gemmatimonadales;f__Gemmatimonadaceae;g__                           | 0   | 0   | 0   | 0    | 6    | 0 |

|                                                                                                                                                  |      |       |     |      |      |   |
|--------------------------------------------------------------------------------------------------------------------------------------------------|------|-------|-----|------|------|---|
| k__Bacteria;p__Kiritimatiellaeota;c__Kiritimatiellae;o__WCHB1-41;f__uncultured bacterium;g__uncultured bacterium                                 | 0    | 0     | 2   | 0    | 0    | 0 |
| k__Bacteria;p__Nitrospirae;c__Nitrospira;o__Nitrospirales;f__Nitrospiraceae;g__Nitrospira                                                        | 0    | 0     | 6   | 0    | 3    | 0 |
| k__Bacteria;p__Patescibacteria;c__Saccharimonadia;o__Saccharimonadales;f__Saccharimonadaceae;g__Candidatus Saccharimonas                         | 1620 | 10369 | 933 | 2371 | 2347 | 0 |
| k__Bacteria;p__Patescibacteria;c__Saccharimonadia;o__Saccharimonadales;f__Saccharimonadaceae;g__uncultured Candidatus Saccharibacteria bacterium | 0    | 0     | 3   | 0    | 0    | 0 |
| k__Bacteria;p__Patescibacteria;c__Saccharimonadia;o__Saccharimonadales;f__Saccharimonadaceae;g__uncultured bacterium                             | 0    | 0     | 0   | 6    | 18   | 0 |
| k__Bacteria;p__Patescibacteria;c__Saccharimonadia;o__Saccharimonadales;f__Saccharimonadaceae;g__                                                 | 5    | 2     | 3   | 0    | 7    | 0 |
| k__Bacteria;p__Patescibacteria;c__Saccharimonadia;o__Saccharimonadales;g__                                                                       | 0    | 2     | 0   | 2    | 0    | 0 |
| k__Bacteria;p__Planctomycetes;c__Phycisphaerae;o__Phycisphaerales;f__Phycisphaeraeae;g__SM1A02                                                   | 59   | 0     | 37  | 14   | 46   | 0 |
| k__Bacteria;p__Planctomycetes;c__Planctomycetacia;o__Gemmatales;f__Gemmataceae;g__Gemmata                                                        | 29   | 3     | 36  | 37   | 69   | 0 |
| k__Bacteria;p__Planctomycetes;c__Planctomycetacia;o__Gemmatales;f__Gemmataceae;g__uncultured                                                     | 0    | 7     | 8   | 0    | 6    | 0 |
| k__Bacteria;p__Planctomycetes;c__Planctomycetacia;o__Planctomycetales;f__uncultured;g__uncultured bacterium                                      | 4    | 0     | 0   | 0    | 0    | 0 |
| k__Bacteria;p__Proteobacteria;c__Alphaproteobacteria;o__Acetobacterales;f__Acetobacteraceae;g__Gluconobacter                                     | 3    | 0     | 0   | 0    | 0    | 0 |
| k__Bacteria;p__Proteobacteria;c__Alphaproteobacteria;o__Acetobacterales;f__Acetobacteraceae;g__uncultured                                        | 0    | 0     | 5   | 0    | 8    | 0 |
| k__Bacteria;p__Proteobacteria;c__Alphaproteobacteria;o__Caulobacterales;f__Caulobacteraceae;g__Brevundimonas                                     | 128  | 40    | 29  | 50   | 85   | 0 |
| k__Bacteria;p__Proteobacteria;c__Alphaproteobacteria;o__Caulobacterales;f__Caulobacteraceae;g__Caulobacter                                       | 126  | 36    | 90  | 59   | 153  | 0 |
| k__Bacteria;p__Proteobacteria;c__Alphaproteobacteria;o__Caulobacterales;f__Hyphomonadaceae;g__Hyphomonas                                         | 0    | 0     | 0   | 0    | 4    | 0 |
| k__Bacteria;p__Proteobacteria;c__Alphaproteobacteria;o__Dongiiales;f__Dongiaceae;g__Dongia                                                       | 7    | 0     | 0   | 0    | 0    | 0 |

|                                                                                                                                           |     |     |     |     |     |    |
|-------------------------------------------------------------------------------------------------------------------------------------------|-----|-----|-----|-----|-----|----|
| k__Bacteria;p__Proteobacteria;c__Alphaproteobacteria;o__Elsterales;f__Elsteraceae;g__Elstera                                              | 0   | 2   | 0   | 0   | 0   | 0  |
| k__Bacteria;p__Proteobacteria;c__Alphaproteobacteria;o__Elsterales;f__Elsteraceae;g__uncultured                                           | 26  | 12  | 21  | 7   | 19  | 0  |
| k__Bacteria;p__Proteobacteria;c__Alphaproteobacteria;o__Holosporales;f__Holosporaceae;g__uncultured                                       | 318 | 147 | 272 | 96  | 239 | 0  |
| k__Bacteria;p__Proteobacteria;c__Alphaproteobacteria;o__Paracaedibacterales;f__Paracaeidibacteraceae;g__uncultured                        | 0   | 0   | 0   | 0   | 13  | 0  |
| k__Bacteria;p__Proteobacteria;c__Alphaproteobacteria;o__Reyranelles;f__Reyranelleae;g__Reyranelle                                         | 15  | 0   | 13  | 5   | 22  | 0  |
| k__Bacteria;p__Proteobacteria;c__Alphaproteobacteria;o__Rhizobiales;f__Beijerinckiaceae;g__Bosea                                          | 6   | 0   | 0   | 0   | 0   | 0  |
| k__Bacteria;p__Proteobacteria;c__Alphaproteobacteria;o__Rhizobiales;f__Beijerinckiaceae;g__Methylobacterium                               | 712 | 289 | 339 | 489 | 834 | 0  |
| k__Bacteria;p__Proteobacteria;c__Alphaproteobacteria;o__Rhizobiales;f__Beijerinckiaceae;g__Methylocystis                                  | 0   | 0   | 10  | 0   | 0   | 0  |
| k__Bacteria;p__Proteobacteria;c__Alphaproteobacteria;o__Rhizobiales;f__Beijerinckiaceae;g__Microvirga                                     | 4   | 0   | 0   | 0   | 0   | 0  |
| k__Bacteria;p__Proteobacteria;c__Alphaproteobacteria;o__Rhizobiales;f__Beijerinckiaceae;g__alphaI cluster                                 | 0   | 6   | 7   | 0   | 0   | 0  |
| k__Bacteria;p__Proteobacteria;c__Alphaproteobacteria;o__Rhizobiales;f__Devosiaceae;g__Devosia                                             | 3   | 0   | 0   | 0   | 0   | 0  |
| k__Bacteria;p__Proteobacteria;c__Alphaproteobacteria;o__Rhizobiales;f__Hyphomicrobiaceae;g__Pedomicrobium                                 | 0   | 0   | 0   | 0   | 6   | 0  |
| k__Bacteria;p__Proteobacteria;c__Alphaproteobacteria;o__Rhizobiales;f__Kaistiaceae;g__Kaistia                                             | 109 | 11  | 66  | 30  | 60  | 0  |
| k__Bacteria;p__Proteobacteria;c__Alphaproteobacteria;o__Rhizobiales;f__Labraceae;g__Labrys                                                | 7   | 5   | 0   | 4   | 10  | 0  |
| k__Bacteria;p__Proteobacteria;c__Alphaproteobacteria;o__Rhizobiales;f__Rhizobiaceae;g__Allorhizobium-Neorhizobium-Pararhizobium-Rhizobium | 18  | 14  | 15  | 0   | 14  | 14 |
| k__Bacteria;p__Proteobacteria;c__Alphaproteobacteria;o__Rhizobiales;f__Rhizobiaceae;g__Aminobacter                                        | 0   | 5   | 0   | 0   | 0   | 0  |
| k__Bacteria;p__Proteobacteria;c__Alphaproteobacteria;o__Rhizobiales;f__Rhizobiaceae;g__Mesorhizobium                                      | 8   | 13  | 17  | 13  | 30  | 0  |

|                                                                                                                     |     |     |     |    |    |    |
|---------------------------------------------------------------------------------------------------------------------|-----|-----|-----|----|----|----|
| k__Bacteria;p__Proteobacteria;c__Alphaproteobacteria;o__Rhizobiales;f__Rhizobiaceae;g__Ochrobactrum                 | 43  | 0   | 28  | 0  | 13 | 11 |
| k__Bacteria;p__Proteobacteria;c__Alphaproteobacteria;o__Rhizobiales;f__Rhizobiaceae;g__Paenochrobactrum             | 0   | 12  | 0   | 0  | 0  | 0  |
| k__Bacteria;p__Proteobacteria;c__Alphaproteobacteria;o__Rhizobiales;f__Rhizobiaceae;g__uncultured                   | 0   | 0   | 0   | 2  | 0  | 0  |
| k__Bacteria;p__Proteobacteria;c__Alphaproteobacteria;o__Rhizobiales;f__Rhizobiales Incertae Sedis;g__Nordella       | 0   | 0   | 0   | 0  | 2  | 0  |
| k__Bacteria;p__Proteobacteria;c__Alphaproteobacteria;o__Rhizobiales;f__Rhizobiales Incertae Sedis;g__uncultured     | 0   | 0   | 0   | 5  | 0  | 0  |
| k__Bacteria;p__Proteobacteria;c__Alphaproteobacteria;o__Rhizobiales;f__Xanthobacteraceae;g__Bradyrhizobium          | 82  | 39  | 195 | 91 | 80 | 0  |
| k__Bacteria;p__Proteobacteria;c__Alphaproteobacteria;o__Rhizobiales;f__Xanthobacteraceae;g__Xanthobacter            | 11  | 0   | 0   | 0  | 0  | 0  |
| k__Bacteria;p__Proteobacteria;c__Alphaproteobacteria;o__Rhizobiales;f__Xanthobacteraceae;g__uncultured              | 0   | 0   | 0   | 0  | 7  | 0  |
| k__Bacteria;p__Proteobacteria;c__Alphaproteobacteria;o__Rhodobacterales;f__Rhodobacteraceae;g__Amaricoccus          | 0   | 0   | 8   | 0  | 0  | 0  |
| k__Bacteria;p__Proteobacteria;c__Alphaproteobacteria;o__Rhodobacterales;f__Rhodobacteraceae;g__Palleronia           | 0   | 0   | 0   | 0  | 7  | 0  |
| k__Bacteria;p__Proteobacteria;c__Alphaproteobacteria;o__Rhodobacterales;f__Rhodobacteraceae;g__Paracoccus           | 532 | 117 | 274 | 11 | 20 | 4  |
| k__Bacteria;p__Proteobacteria;c__Alphaproteobacteria;o__Rhodobacterales;f__Rhodobacteraceae;g__Rubellimicrobium     | 0   | 0   | 0   | 0  | 10 | 0  |
| k__Bacteria;p__Proteobacteria;c__Alphaproteobacteria;o__Rhodobacterales;f__Rhodobacteraceae;g__uncultured           | 0   | 0   | 0   | 0  | 5  | 0  |
| k__Bacteria;p__Proteobacteria;c__Alphaproteobacteria;o__Rhodobacterales;f__Rhodobacteraceae;g__                     | 0   | 0   | 0   | 0  | 5  | 0  |
| k__Bacteria;p__Proteobacteria;c__Alphaproteobacteria;o__Rhodospirillales;f__Rhodopirillaceae;g__Defluviicoccus      | 29  | 0   | 0   | 0  | 12 | 0  |
| k__Bacteria;p__Proteobacteria;c__Alphaproteobacteria;o__Rhodospirillales;f__Rhodopirillaceae;g__Candidatus Riegeria | 0   | 0   | 6   | 0  | 0  | 0  |
| k__Bacteria;p__Proteobacteria;c__Alphaproteobacteria;o__Rhodospirillales;f__uncultured;g__gut metagenome            | 7   | 28  | 0   | 0  | 0  | 0  |



|                                                                                                                           |       |      |       |      |       |   |
|---------------------------------------------------------------------------------------------------------------------------|-------|------|-------|------|-------|---|
| k__Bacteria;p__Proteobacteria;c__Alphaproteobacteria;o__Rhodospirillales;f__uncultured;g__uncultured bacterium            | 12    | 89   | 7     | 150  | 15    | 0 |
| k__Bacteria;p__Proteobacteria;c__Alphaproteobacteria;o__Rhodospirillales;f__uncultured;g__uncultured bacterium            | 0     | 0    | 0     | 0    | 64    | 0 |
| k__Bacteria;p__Proteobacteria;c__Alphaproteobacteria;o__Rickettsiales;f__Mitochondria;g__uncultured alpha proteobacterium | 0     | 9    | 0     | 11   | 6     | 0 |
| k__Bacteria;p__Proteobacteria;c__Alphaproteobacteria;o__Rickettsiales;f__Mitochondria;g__uncultured alpha proteobacterium | 17    | 10   | 16    | 19   | 12    | 0 |
| k__Bacteria;p__Proteobacteria;c__Alphaproteobacteria;o__Rickettsiales;f__uncultured;g__uncultured alpha proteobacterium   | 0     | 0    | 0     | 67   | 18    | 0 |
| k__Bacteria;p__Proteobacteria;c__Alphaproteobacteria;o__Rickettsiales;f__uncultured;g__uncultured bacterium               | 3     | 10   | 0     | 0    | 0     | 0 |
| k__Bacteria;p__Proteobacteria;c__Alphaproteobacteria;o__Rickettsiales;f__uncultured;g__uncultured bacterium               | 13    | 26   | 17    | 26   | 0     | 0 |
| k__Bacteria;p__Proteobacteria;c__Alphaproteobacteria;o__Sneathiellales;f__Sneathiellaceae;g__Taonella                     | 67    | 7    | 79    | 42   | 82    | 0 |
| k__Bacteria;p__Proteobacteria;c__Alphaproteobacteria;o__Sphingomonadales;f__Sphingomonadaceae;g__Blastomonas              | 26    | 10   | 0     | 0    | 33    | 0 |
| k__Bacteria;p__Proteobacteria;c__Alphaproteobacteria;o__Sphingomonadales;f__Sphingomonadaceae;g__Novosphingobium          | 30170 | 8210 | 20920 | 9750 | 33073 | 2 |
| k__Bacteria;p__Proteobacteria;c__Alphaproteobacteria;o__Sphingomonadales;f__Sphingomonadaceae;g__Sphingobium              | 82    | 44   | 135   | 57   | 98    | 0 |
| k__Bacteria;p__Proteobacteria;c__Alphaproteobacteria;o__Sphingomonadales;f__Sphingomonadaceae;g__Sphingomonas             | 349   | 54   | 145   | 69   | 289   | 8 |
| k__Bacteria;p__Proteobacteria;c__Alphaproteobacteria;o__Sphingomonadales;f__Sphingomonadaceae;g__Sphingomonas             | 0     | 0    | 4     | 0    | 0     | 0 |
| k__Bacteria;p__Proteobacteria;c__Alphaproteobacteria;o__Tistrellales;f__Geminicoccaceae;g__Geminicoccus                   | 8     | 0    | 13    | 0    | 0     | 0 |
| k__Bacteria;p__Proteobacteria;c__Alphaproteobacteria;o__uncultured;f__uncultured;g__uncultured bacterium                  | 14    | 0    | 16    | 0    | 13    | 0 |
| k__Bacteria;p__Proteobacteria;c__Deltaproteobacteria;o__Bdellovibrionales;f__Bacteriovoraceae;g__Peredibacter             | 0     | 0    | 0     | 0    | 3     | 0 |
| k__Bacteria;p__Proteobacteria;c__Deltaproteobacteria;o__Bdellovibrionales;f__Bdellovibrionaceae;g__OM27 clade             | 3     | 0    | 0     | 0    | 0     | 0 |
| k__Bacteria;p__Proteobacteria;c__Deltaproteobacteria;o__Desulfarculales;f__Desulfarculaceae;g__uncultured                 | 10    | 0    | 0     | 0    | 0     | 0 |

|                                                                                                                              |    |     |    |     |     |   |
|------------------------------------------------------------------------------------------------------------------------------|----|-----|----|-----|-----|---|
| k__Bacteria;p__Proteobacteria;c__Deltaproteobacteria;o__Desulfobacterales;f__Desulfobulbaceae;g__Desulfobulbus               | 0  | 0   | 0  | 0   | 5   | 3 |
| k__Bacteria;p__Proteobacteria;c__Deltaproteobacteria;o__Desulfobacterales;f__Desulfobulbaceae;g__Desulfofustis               | 0  | 0   | 0  | 0   | 3   | 0 |
| k__Bacteria;p__Proteobacteria;c__Deltaproteobacteria;o__Desulfovibrionales;f__Desulfovibrionaceae;g__Bilophila               | 0  | 6   | 6  | 6   | 0   | 0 |
| k__Bacteria;p__Proteobacteria;c__Deltaproteobacteria;o__Desulfovibrionales;f__Desulfovibrionaceae;g__Desulfovibrio           | 0  | 238 | 40 | 96  | 61  | 0 |
| k__Bacteria;p__Proteobacteria;c__Deltaproteobacteria;o__Desulfovibrionales;f__Desulfovibrionaceae;g__Lawsonia                | 0  | 0   | 10 | 61  | 315 | 0 |
| k__Bacteria;p__Proteobacteria;c__Deltaproteobacteria;o__Desulfovibrionales;f__Desulfovibrionaceae;g__uncultured              | 0  | 123 | 0  | 102 | 11  | 0 |
| k__Bacteria;p__Proteobacteria;c__Deltaproteobacteria;o__Desulfuromonadales;f__Geobacteraceae;g__Geobacter                    | 0  | 0   | 0  | 0   | 8   | 9 |
| k__Bacteria;p__Proteobacteria;c__Deltaproteobacteria;o__MBNT15;f__delta proteobacterium WX152;g__delta proteobacterium WX152 | 0  | 0   | 7  | 0   | 0   | 0 |
| k__Bacteria;p__Proteobacteria;c__Deltaproteobacteria;o__Myxococcales;f__Blfdi19;g__                                          | 0  | 2   | 0  | 0   | 0   | 0 |
| k__Bacteria;p__Proteobacteria;c__Gammaproteobacteria;o__Aeromonadales;f__Aeromonadaceae;g__Aeromonas                         | 49 | 0   | 36 | 4   | 0   | 0 |
| k__Bacteria;p__Proteobacteria;c__Gammaproteobacteria;o__Aeromonadales;f__Aeromonadaceae;g__Oceanimonas                       | 0  | 184 | 0  | 0   | 0   | 0 |
| k__Bacteria;p__Proteobacteria;c__Gammaproteobacteria;o__Alteromonadales;f__Alteromonadaceae;g__Rheinheimera                  | 6  | 0   | 0  | 0   | 0   | 2 |
| k__Bacteria;p__Proteobacteria;c__Gammaproteobacteria;o__Alteromonadales;f__Alteromonadaceae;g__                              | 3  | 0   | 0  | 0   | 0   | 0 |
| k__Bacteria;p__Proteobacteria;c__Gammaproteobacteria;o__Alteromonadales;f__Idiomarinaeae;g__Aliidiomarina                    | 0  | 22  | 0  | 0   | 0   | 0 |
| k__Bacteria;p__Proteobacteria;c__Gammaproteobacteria;o__Alteromonadales;f__Idiomarinaeae;g__Idiomarina                       | 0  | 12  | 0  | 0   | 0   | 0 |
| k__Bacteria;p__Proteobacteria;c__Gammaproteobacteria;o__Alteromonadales;f__Marinobacteraceae;g__Marinobacter                 | 5  | 0   | 0  | 0   | 0   | 0 |
| k__Bacteria;p__Proteobacteria;c__Gammaproteobacteria;o__Alteromonadales;f__Shewanellaceae;g__Shewanella                      | 0  | 0   | 0  | 0   | 4   | 0 |

|                                                                                                                                                 |     |     |    |     |    |    |
|-------------------------------------------------------------------------------------------------------------------------------------------------|-----|-----|----|-----|----|----|
| k__Bacteria;p__Proteobacteria;c__Gammaproteobacteria;o__Betaproteobacteriales;f__Burkholderiaceae;g__AAP99                                      | 0   | 2   | 0  | 0   | 0  | 0  |
| k__Bacteria;p__Proteobacteria;c__Gammaproteobacteria;o__Betaproteobacteriales;f__Burkholderiaceae;g__Achromobacter                              | 77  | 17  | 16 | 12  | 34 | 0  |
| k__Bacteria;p__Proteobacteria;c__Gammaproteobacteria;o__Betaproteobacteriales;f__Burkholderiaceae;g__Aquabacterium                              | 14  | 0   | 22 | 0   | 0  | 0  |
| k__Bacteria;p__Proteobacteria;c__Gammaproteobacteria;o__Betaproteobacteriales;f__Burkholderiaceae;g__Burkholderia-Caballeronia-Paraburkholderia | 117 | 33  | 77 | 34  | 87 | 0  |
| k__Bacteria;p__Proteobacteria;c__Gammaproteobacteria;o__Betaproteobacteriales;f__Burkholderiaceae;g__Candidatus Tremblaya                       | 0   | 0   | 0  | 0   | 5  | 0  |
| k__Bacteria;p__Proteobacteria;c__Gammaproteobacteria;o__Betaproteobacteriales;f__Burkholderiaceae;g__Comamonas                                  | 0   | 0   | 0  | 0   | 10 | 0  |
| k__Bacteria;p__Proteobacteria;c__Gammaproteobacteria;o__Betaproteobacteriales;f__Burkholderiaceae;g__Cupriavidus                                | 0   | 0   | 0  | 5   | 8  | 0  |
| k__Bacteria;p__Proteobacteria;c__Gammaproteobacteria;o__Betaproteobacteriales;f__Burkholderiaceae;g__Delftia                                    | 58  | 10  | 17 | 10  | 51 | 43 |
| k__Bacteria;p__Proteobacteria;c__Gammaproteobacteria;o__Betaproteobacteriales;f__Burkholderiaceae;g__Duganella                                  | 0   | 0   | 0  | 0   | 7  | 0  |
| k__Bacteria;p__Proteobacteria;c__Gammaproteobacteria;o__Betaproteobacteriales;f__Burkholderiaceae;g__Herbaspirillum                             | 52  | 0   | 14 | 0   | 19 | 26 |
| k__Bacteria;p__Proteobacteria;c__Gammaproteobacteria;o__Betaproteobacteriales;f__Burkholderiaceae;g__Janthinobacterium                          | 23  | 0   | 0  | 0   | 25 | 0  |
| k__Bacteria;p__Proteobacteria;c__Gammaproteobacteria;o__Betaproteobacteriales;f__Burkholderiaceae;g__Lautropia                                  | 0   | 0   | 4  | 0   | 0  | 0  |
| k__Bacteria;p__Proteobacteria;c__Gammaproteobacteria;o__Betaproteobacteriales;f__Burkholderiaceae;g__Massilia                                   | 0   | 0   | 9  | 0   | 0  | 0  |
| k__Bacteria;p__Proteobacteria;c__Gammaproteobacteria;o__Betaproteobacteriales;f__Burkholderiaceae;g__Oligella                                   | 4   | 810 | 28 | 0   | 0  | 0  |
| k__Bacteria;p__Proteobacteria;c__Gammaproteobacteria;o__Betaproteobacteriales;f__Burkholderiaceae;g__Paenalcaligenes                            | 0   | 125 | 0  | 0   | 0  | 0  |
| k__Bacteria;p__Proteobacteria;c__Gammaproteobacteria;o__Betaproteobacteriales;f__Burkholderiaceae;g__Parasutterella                             | 0   | 202 | 68 | 156 | 31 | 0  |
| k__Bacteria;p__Proteobacteria;c__Gammaproteobacteria;o__Betaproteobacteriales;f__Burkholderiaceae;g__Pelistega                                  | 0   | 0   | 0  | 0   | 5  | 0  |

|                                                                                                                      |    |    |     |    |    |   |
|----------------------------------------------------------------------------------------------------------------------|----|----|-----|----|----|---|
| k__Bacteria;p__Proteobacteria;c__Gammaproteobacteria;o__Betaproteobacteriales;f__Burkholderiaceae;g__Pelomonas       | 44 | 0  | 0   | 11 | 27 | 0 |
| k__Bacteria;p__Proteobacteria;c__Gammaproteobacteria;o__Betaproteobacteriales;f__Burkholderiaceae;g__Pseudacidovorax | 0  | 0  | 6   | 0  | 0  | 0 |
| k__Bacteria;p__Proteobacteria;c__Gammaproteobacteria;o__Betaproteobacteriales;f__Burkholderiaceae;g__Pusillimonas    | 0  | 16 | 0   | 0  | 0  | 0 |
| k__Bacteria;p__Proteobacteria;c__Gammaproteobacteria;o__Betaproteobacteriales;f__Burkholderiaceae;g__Ralstonia       | 0  | 0  | 0   | 0  | 0  | 3 |
| k__Bacteria;p__Proteobacteria;c__Gammaproteobacteria;o__Betaproteobacteriales;f__Burkholderiaceae;g__uncultured      | 0  | 7  | 0   | 11 | 6  | 0 |
| k__Bacteria;p__Proteobacteria;c__Gammaproteobacteria;o__Betaproteobacteriales;f__Burkholderiaceae;g__                | 17 | 11 | 0   | 0  | 31 | 0 |
| k__Bacteria;p__Proteobacteria;c__Gammaproteobacteria;o__Betaproteobacteriales;f__Hydrogenophilaceae;g__Tepidiphilus  | 25 | 0  | 12  | 0  | 0  | 9 |
| k__Bacteria;p__Proteobacteria;c__Gammaproteobacteria;o__Betaproteobacteriales;f__Methylophilaceae;g__Methylophilus   | 0  | 0  | 0   | 3  | 0  | 0 |
| k__Bacteria;p__Proteobacteria;c__Gammaproteobacteria;o__Betaproteobacteriales;f__Methylophilaceae;g__                | 7  | 0  | 0   | 0  | 0  | 0 |
| k__Bacteria;p__Proteobacteria;c__Gammaproteobacteria;o__Betaproteobacteriales;f__Neisseriaceae;g__Eikenella          | 0  | 7  | 0   | 0  | 0  | 0 |
| k__Bacteria;p__Proteobacteria;c__Gammaproteobacteria;o__Betaproteobacteriales;f__Neisseriaceae;g__Neisseria          | 16 | 9  | 149 | 6  | 9  | 0 |
| k__Bacteria;p__Proteobacteria;c__Gammaproteobacteria;o__Betaproteobacteriales;f__Neisseriaceae;g__uncultured         | 0  | 0  | 7   | 0  | 0  | 0 |
| k__Bacteria;p__Proteobacteria;c__Gammaproteobacteria;o__Betaproteobacteriales;f__Nitrosomonadaceae;g__DSSD61         | 28 | 5  | 21  | 11 | 8  | 0 |
| k__Bacteria;p__Proteobacteria;c__Gammaproteobacteria;o__Betaproteobacteriales;f__Rhodocyclaceae;g__Thauera           | 0  | 0  | 0   | 0  | 4  | 0 |
| k__Bacteria;p__Proteobacteria;c__Gammaproteobacteria;o__Betaproteobacteriales;f__TRA3-20;g__                         | 0  | 5  | 0   | 0  | 0  | 0 |
| k__Bacteria;p__Proteobacteria;c__Gammaproteobacteria;o__Cardiobacteriales;f__Cardiobacteriaceae;g__uncultured        | 0  | 0  | 0   | 0  | 5  | 0 |
| k__Bacteria;p__Proteobacteria;c__Gammaproteobacteria;o__Cellvibrionales;f__Cellvibrionaceae;g__Cellvibrio            | 0  | 0  | 0   | 7  | 0  | 0 |

|                                                                                                                             |     |      |    |     |    |   |
|-----------------------------------------------------------------------------------------------------------------------------|-----|------|----|-----|----|---|
| k__Bacteria;p__Proteobacteria;c__Gammaproteobacteria;o__Cellvibrionales;f__Cellvibrionaceae;g__uncultured                   | 0   | 0    | 0  | 0   | 3  | 0 |
| k__Bacteria;p__Proteobacteria;c__Gammaproteobacteria;o__Diplorickettsiales;f__Diplorickettsiaceae;g__Rickettsiella          | 0   | 10   | 0  | 0   | 0  | 0 |
| k__Bacteria;p__Proteobacteria;c__Gammaproteobacteria;o__Diplorickettsiales;f__Diplorickettsiaceae;g__uncultured             | 0   | 0    | 15 | 0   | 6  | 0 |
| k__Bacteria;p__Proteobacteria;c__Gammaproteobacteria;o__EPR3968-O8a-Bc78;__;__                                              | 0   | 0    | 0  | 0   | 7  | 0 |
| k__Bacteria;p__Proteobacteria;c__Gammaproteobacteria;o__Enterobacteriales;f__Enterobacteriaceae;g__Enterobacter             | 28  | 15   | 0  | 2   | 0  | 0 |
| k__Bacteria;p__Proteobacteria;c__Gammaproteobacteria;o__Enterobacteriales;f__Enterobacteriaceae;g__Escherichia-Shigella     | 44  | 12   | 18 | 12  | 34 | 0 |
| k__Bacteria;p__Proteobacteria;c__Gammaproteobacteria;o__Enterobacteriales;f__Enterobacteriaceae;g__Klebsiella               | 25  | 0    | 0  | 6   | 11 | 0 |
| k__Bacteria;p__Proteobacteria;c__Gammaproteobacteria;o__Enterobacteriales;f__Enterobacteriaceae;g__Pantoea                  | 8   | 0    | 0  | 0   | 13 | 0 |
| k__Bacteria;p__Proteobacteria;c__Gammaproteobacteria;o__Enterobacteriales;f__Enterobacteriaceae;g__Pectobacterium           | 0   | 0    | 7  | 0   | 0  | 0 |
| k__Bacteria;p__Proteobacteria;c__Gammaproteobacteria;o__Enterobacteriales;f__Enterobacteriaceae;g__Proteus                  | 5   | 0    | 0  | 0   | 0  | 0 |
| k__Bacteria;p__Proteobacteria;c__Gammaproteobacteria;o__Enterobacteriales;f__Enterobacteriaceae;g__Serratia                 | 7   | 0    | 3  | 0   | 5  | 5 |
| k__Bacteria;p__Proteobacteria;c__Gammaproteobacteria;o__Enterobacteriales;f__Enterobacteriaceae;g__                         | 108 | 0    | 41 | 218 | 52 | 0 |
| k__Bacteria;p__Proteobacteria;c__Gammaproteobacteria;o__Gammaproteobacteria Incertae Sedis;f__Unknown Family;g__Acidibacter | 53  | 11   | 31 | 15  | 46 | 0 |
| k__Bacteria;p__Proteobacteria;c__Gammaproteobacteria;o__Legionellales;f__Legionellaceae;g__Legionella                       | 0   | 0    | 0  | 0   | 13 | 0 |
| k__Bacteria;p__Proteobacteria;c__Gammaproteobacteria;o__Oceanospirillales;f__Halomonadaceae;g__Chromohalobacter             | 0   | 0    | 0  | 3   | 0  | 0 |
| k__Bacteria;p__Proteobacteria;c__Gammaproteobacteria;o__Oceanospirillales;f__Halomonadaceae;g__Halomonas                    | 14  | 3188 | 14 | 0   | 0  | 0 |
| k__Bacteria;p__Proteobacteria;c__Gammaproteobacteria;o__Oceanospirillales;f__Pseudohongiellaceae;g__Pseudohongiella         | 0   | 0    | 0  | 0   | 7  | 0 |

|                                                                                                                  |     |       |     |    |     |   |
|------------------------------------------------------------------------------------------------------------------|-----|-------|-----|----|-----|---|
| k__Bacteria;p__Proteobacteria;c__Gammaproteobacteria;o__Orbales;f__Orbaceae;g__Gilliamella                       | 0   | 2     | 0   | 0  | 0   | 0 |
| k__Bacteria;p__Proteobacteria;c__Gammaproteobacteria;o__Pasteurellales;f__Pasteurellaceae;g__Aggregatibacter     | 0   | 0     | 43  | 0  | 0   | 0 |
| k__Bacteria;p__Proteobacteria;c__Gammaproteobacteria;o__Pasteurellales;f__Pasteurellaceae;g__Haemophilus         | 5   | 0     | 92  | 0  | 0   | 0 |
| k__Bacteria;p__Proteobacteria;c__Gammaproteobacteria;o__Pasteurellales;f__Pasteurellaceae;g__Rodentibacter       | 0   | 34    | 9   | 7  | 20  | 0 |
| k__Bacteria;p__Proteobacteria;c__Gammaproteobacteria;o__Pseudomonadales;f__Moraxellaceae;g__Acinetobacter        | 176 | 46    | 250 | 34 | 200 | 0 |
| k__Bacteria;p__Proteobacteria;c__Gammaproteobacteria;o__Pseudomonadales;f__Moraxellaceae;g__Enhydrobacter        | 16  | 0     | 19  | 0  | 11  | 0 |
| k__Bacteria;p__Proteobacteria;c__Gammaproteobacteria;o__Pseudomonadales;f__Moraxellaceae;g__Psychrobacter        | 28  | 10789 | 535 | 57 | 194 | 0 |
| k__Bacteria;p__Proteobacteria;c__Gammaproteobacteria;o__Pseudomonadales;f__Moraxellaceae;g__                     | 0   | 0     | 7   | 0  | 0   | 0 |
| k__Bacteria;p__Proteobacteria;c__Gammaproteobacteria;o__Pseudomonadales;f__Pseudomonadaceae;g__Pseudomonas       | 307 | 627   | 15  | 75 | 393 | 0 |
| k__Bacteria;p__Proteobacteria;c__Gammaproteobacteria;o__Salinisphaerales;f__Solimonadaceae;g__Hydrocarboniphaga  | 18  | 0     | 14  | 0  | 37  | 0 |
| k__Bacteria;p__Proteobacteria;c__Gammaproteobacteria;o__Vibrionales;f__Vibrionaceae;g__Vibrio                    | 0   | 0     | 17  | 0  | 0   | 0 |
| k__Bacteria;p__Proteobacteria;c__Gammaproteobacteria;o__Xanthomonadales;f__Rhodanobacteraceae;g__Rhodanobacter   | 12  | 0     | 0   | 0  | 0   | 0 |
| k__Bacteria;p__Proteobacteria;c__Gammaproteobacteria;o__Xanthomonadales;f__Rhodanobacteraceae;g__uncultured      | 6   | 0     | 0   | 0  | 0   | 4 |
| k__Bacteria;p__Proteobacteria;c__Gammaproteobacteria;o__Xanthomonadales;f__Xanthomonadaceae;g__Luteimonas        | 0   | 0     | 0   | 0  | 11  | 0 |
| k__Bacteria;p__Proteobacteria;c__Gammaproteobacteria;o__Xanthomonadales;f__Xanthomonadaceae;g__Lysobacter        | 0   | 44    | 3   | 0  | 0   | 0 |
| k__Bacteria;p__Proteobacteria;c__Gammaproteobacteria;o__Xanthomonadales;f__Xanthomonadaceae;g__Pseudoxanthomonas | 0   | 0     | 0   | 0  | 9   | 0 |
| k__Bacteria;p__Proteobacteria;c__Gammaproteobacteria;o__Xanthomonadales;f__Xanthomonadaceae;g__Stenotrophomonas  | 65  | 0     | 30  | 0  | 17  | 6 |

|                                                                                                                |    |    |    |      |       |   |
|----------------------------------------------------------------------------------------------------------------|----|----|----|------|-------|---|
| k__Bacteria;p__Proteobacteria;c__Gammaproteobacteria;o__Xanthomonadales;f__Xanthomonadaceae;g__uncultured      | 0  | 13 | 0  | 0    | 0     | 0 |
| k__Bacteria;p__Proteobacteria;c__Gammaproteobacteria;o__uncultured;f__metagenome;g__metagenome                 | 0  | 0  | 0  | 0    | 4     | 0 |
| k__Bacteria;p__Proteobacteria;c__Gammaproteobacteria;o__uncultured;__;__                                       | 4  | 0  | 4  | 0    | 0     | 0 |
| k__Bacteria;p__Proteobacteria;c__Gammaproteobacteria;__;__;__                                                  | 0  | 0  | 4  | 0    | 0     | 0 |
| k__Bacteria;p__Spirochaetes;c__Spirochaetia;o__Spirochaetales;f__Spirochaetaceae;g__T<br>reponema 2            | 8  | 0  | 10 | 33   | 24    | 0 |
| k__Bacteria;p__Spirochaetes;c__Spirochaetia;o__Spirochaetales;f__Spirochaetaceae;__                            | 4  | 74 | 5  | 29   | 9     | 0 |
| k__Bacteria;p__Synergistetes;c__Synergistia;o__Synergistales;f__Synergistaceae;g__JGI-<br>0000079-D21          | 8  | 0  | 0  | 0    | 0     | 0 |
| k__Bacteria;p__Tenericutes;c__Mollicutes;o__Anaeroplasmatales;f__Anaeroplasmataceae<br>;g__Anaeroplasma        | 37 | 47 | 11 | 137  | 29    | 0 |
| k__Bacteria;p__Tenericutes;c__Mollicutes;o__Izimaplasmatales;f__gut<br>metagenome;g__gut metagenome            | 0  | 38 | 0  | 0    | 0     | 0 |
| k__Bacteria;p__Tenericutes;c__Mollicutes;o__Mollicutes<br>RF39;f__metagenome;g__metagenome                     | 0  | 0  | 0  | 6    | 0     | 0 |
| k__Bacteria;p__Tenericutes;c__Mollicutes;o__Mollicutes RF39;f__uncultured<br>bacterium;g__uncultured bacterium | 0  | 59 | 0  | 21   | 25    | 0 |
| k__Bacteria;p__Tenericutes;c__Mollicutes;o__Mollicutes RF39;__;__                                              | 10 | 26 | 3  | 13   | 33    | 0 |
| k__Bacteria;p__Tenericutes;c__Mollicutes;o__Mycoplasmatales;f__Mycoplasmataceae;g__<br>Mycoplasma              | 22 | 17 | 10 | 46   | 5     | 0 |
| k__Bacteria;p__Verrucomicrobia;c__Verrucomicrobiae;o__Opitutales;f__Puniceicoccacea<br>e;g__uncultured         | 0  | 15 | 0  | 14   | 6     | 0 |
| k__Bacteria;p__Verrucomicrobia;c__Verrucomicrobiae;o__Pedosphaerales;f__Pedosphae<br>raceae;__                 | 0  | 0  | 0  | 5    | 0     | 0 |
| k__Bacteria;p__Verrucomicrobia;c__Verrucomicrobiae;o__Verrucomicrobiales;f__Akker<br>mansiaceae;g__Akkermansia | 0  | 0  | 40 | 1821 | 14231 | 5 |
| k__Bacteria;__;__;__;__;__                                                                                     | 3  | 5  | 0  | 2    | 10    | 0 |
| Unassigned;__;__;__;__;__                                                                                      | 9  | 5  | 2  | 6    | 13    | 0 |

## 9. References

- 1- B. J. Callahan, et al. "DADA2: High-resolution sample inference from Illumina amplicon data". In: *Nat. Methods* 13.7 (jul. 2016). [PubMed Central:PMC4927377] [DOI:10.1038/nmeth.3869] [PubMed:27214047] , pp. 581–583.
- 2- Dhariwal, A., Chong, J., Habib, S., King, I., Agellon, LB., and Xia. J. (2017) "MicrobiomeAnalyst - a web-based tool for comprehensive statistical, visual and meta-analysis of microbiome data" *Nucleic Acids Research* 45 W180-188 (doi: 10.1093/nar/gkx295)
